# Supplementary material
Source: PubMed Central journal article supplement (PMC8629028)
Supplement: ehp8109.s001.acco.pdf [file ehp8109.s001.acco.pdf]

**Note to readers with disabilities:** *EHP* strives to ensure that all journal content is accessible to all readers. However, some figures and Supplemental Material published in *EHP* articles may not conform to [508 standards](#) due to the complexity of the information being presented. If you need assistance accessing journal content, please contact [ehp508@niehs.nih.gov](mailto:ehp508@niehs.nih.gov). Our staff will work with you to assess and meet your accessibility needs within 3 working days.

### **Supplemental Material**

#### **Prenatal and Postnatal Household Air Pollution Exposure and Infant Growth Trajectories: Evidence from a Rural Ghanaian Pregnancy Cohort**

Ellen Boamah-Kaali, Darby W. Jack, Kenneth A. Ae-Ngibise, Ashlinn Quinn, Seyram Kaali, Kathryn Dubowski, Felix B. Oppong, Blair J Wylie, Mohammed N. Mujtaba, Carlos F. Gould, Stephaney Gyaase, Steven Chillrud, Seth Owusu-Agyei, Patrick L. Kinney, Kwaku Poku Asante, and Alison G. Lee

#### **Table of Contents**

**Table S1.** Household characteristics used to construct the wealth index.

**Table S2.** Distribution of anthropometric measurements by age, for all children and by study arm.

**Table S3.** Fit statistics for latent class growth analysis.

**Table S4.** Posterior probabilities by trajectory assignment.

**Table S5.** Associations between prenatal and postnatal average carbon monoxide (CO) and growth trajectories: Complete model output.

**Table S6.** Associations between prenatal and postnatal average carbon monoxide (CO) and growth trajectories: Ordinal regression sensitivity models.

**Table S7.** Sex-specific associations between prenatal and postnatal average carbon monoxide (CO) exposure and growth trajectories: Ordinal regression.

**Table S8.** Associations between prenatal and postnatal average carbon monoxide (CO) and lowest z-score trajectory as compared to others: Complete model output.

**Table S9.** Associations between prenatal and postnatal average carbon monoxide (CO) and assignment to the lowest z-score trajectory: Logistic regression sensitivity models.

**Table S10.** Sex-specific associations between prenatal and postnatal average carbon monoxide (CO) and lowest z-score trajectory assignment: Logistic regression.

**Table S11.** Associations between prenatal and postnatal average particulate matter (PM<sub>2.5</sub>) and growth trajectories: Ordinal regression sensitivity models.

**Table S12.** Sex-specific associations between prenatal and postnatal average particulate matter (PM<sub>2.5</sub>) exposure and growth trajectories: Ordinal regression.

**Table S13.** Associations between cookstove intervention arm and anthropometric growth trajectories: Multivariable Ordinal Regression sensitivity models.

**Table S14.** Sex-specific associations between cookstove intervention arm and anthropometric growth trajectories.

**Figure S1.** Directed Acyclic Graph illustrating implied conditional dependencies amongst study variables. The green circle with black inset triangle represents the exposure of interest (prenatal and postnatal household air pollution exposure). The blue circle with the vertical line represents the outcome of interest (infant growth). Green lines represent unbiased causal pathways. Black lines represent neither unbiased causal pathways nor potentially biased paths. White circles represent adjusted variables in the minimally-sufficient adjustment set (infant sex, race/ethnicity, wealth index, maternal age). Sensitivity models additionally adjust for gestational age at delivery, birth weight, breastfeeding duration or maternal body mass index. DAGgity v3.0 available at <http://www.dagitty.net/>.

**Figure S2.** This figure demonstrates a representative plot of a maternal prenatal 72-hour personal carbon monoxide (CO) exposure in parts per million (ppm) over time. The Lascar EL-CO-USB Data Logger was worn in the participant's breathing zone and measured CO levels every 10 seconds which were then averaged into 1-minute averages. Reported cooking periods correspond with elevated CO exposures; outside of these cooking episodes the CO exposures were near zero. The first 48-hours were used in analyses and for this session the 48-hour average CO exposure was 1.62ppm (range 0-79.3ppm).

**Figure S3.** Post intervention exposure by study arm for (A) 48-hr maternal CO measurements, (B) 48-hr children CO measurements, and (C) 48-hr maternal PM<sub>2.5</sub>. Violin plots display mirrored density along the variable range. Boxplots depict the median – extended by a notch for clarity – with lower and upper hinges corresponding with the 25th and 75th percentile. Whiskers extend 1.5 times the interquartile range from the hinge. Outliers beyond the whiskers are depicted as points. Diamonds represent distribution means. In plots A, B, and D the WHO guideline for CO exposure is drawn in a dotted line and in plot C the WHO guidelines for PM<sub>2.5</sub> exposure are drawn in a dotted line (interim guideline: 35) and a solid line (guideline: 10). The y-axis is log-transformed to improve readability because of the clustering of exposure levels at lower values.

**Figure S4.** This figure shows associations between interquartile change in prenatal and postnatal average carbon monoxide (CO) exposure and head circumference (HC), length-for-age z-score (LAZ), length and lowest length-for-age z-score (stunted). Here we show a linear relationship between quartile of CO exposure and LAZ ( $P_{\text{trend}}=0.01$ ), length ( $P_{\text{trend}}=0.01$ ), and stunted ( $P_{\text{trend}}<0.01$ ). We note that while postnatal CO exposure is associated with smaller head circumference trajectory in the primary analyses, we do not see a linear trend in these analyses by interquartile change in CO exposure.

**Table S1. Household characteristics used to construct the wealth index**

|                                                                       | Study Arm       |                             |             | Total<br>(N=1144) |
|-----------------------------------------------------------------------|-----------------|-----------------------------|-------------|-------------------|
|                                                                       | Control (N=414) | Improved biomass<br>(N=430) | LPG (N=300) |                   |
| <b>Do you or anyone in the household own _____? If yes, how many?</b> |                 |                             |             |                   |
| <b>Television</b>                                                     |                 |                             |             |                   |
| Median                                                                | 0               | 0                           | 0           | 0                 |
| Q1, Q3                                                                | 0, 1            | 0, 1                        | 0, 0        | 0, 1              |
| <b>Sleeping Mattress</b>                                              |                 |                             |             |                   |
| Median                                                                | 1               | 1                           | 1           | 1                 |
| Q1, Q3                                                                | 1, 2            | 1, 2                        | 0, 2        | 1, 2              |
| <b>Chicken</b>                                                        |                 |                             |             |                   |
| Median                                                                | 6               | 5                           | 5           | 5                 |
| Q1, Q3                                                                | 0, 15           | 0, 11                       | 0, 10       | 0, 12             |
| <b>Sheep</b>                                                          |                 |                             |             |                   |
| Median                                                                | 0               | 0                           | 0           | 0                 |
| Q1, Q3                                                                | 0, 5            | 0, 3                        | 0, 4        | 0, 4              |
| <b>Cart</b>                                                           |                 |                             |             |                   |
| Median                                                                | 0               | 0                           | 0           | 0                 |
| Q1, Q3                                                                | 0, 0            | 0, 0                        | 0, 0        | 0, 0              |
| <b>Pig</b>                                                            |                 |                             |             |                   |
| Median                                                                | 0               | 0                           | 0           | 0                 |
| Q1, Q3                                                                | 0, 0            | 0, 0                        | 0, 0        | 0, 0              |
| <b>Cattle</b>                                                         |                 |                             |             |                   |
| Median                                                                | 0               | 0                           | 0           | 0                 |
| Q1, Q3                                                                | 0, 0            | 0, 0                        | 0, 0        | 0, 0              |
| <b>Table</b>                                                          |                 |                             |             |                   |
| Median                                                                | 2               | 1                           | 1           | 1                 |
| Q1, Q3                                                                | 1, 2            | 1, 2                        | 1, 2        | 1, 2              |
| <b>Cupboard/wardrobe</b>                                              |                 |                             |             |                   |
| Median                                                                | 0               | 0                           | 0           | 0                 |
| Q1, Q3                                                                | 0, 0            | 0, 0                        | 0, 0        | 0, 0              |
| <b>Radio</b>                                                          |                 |                             |             |                   |
| Median                                                                | 1               | 1                           | 1           | 1                 |
| Q1, Q3                                                                | 0, 1            | 0, 1                        | 1, 1        | 0, 1              |
| <b>Gas or electric cooker</b>                                         |                 |                             |             |                   |
| Median                                                                | 0               | 0                           | 0           | 0                 |
| Q1, Q3                                                                | 0, 0            | 0, 0                        | 0, 0        | 0, 0              |
| <b>Refrigerator or Freezer</b>                                        |                 |                             |             |                   |
| Median                                                                | 0               | 0                           | 0           | 0                 |
| Q1, Q3                                                                | 0, 0            | 0, 0                        | 0, 0        | 0, 0              |
| <b>Bicycle</b>                                                        |                 |                             |             |                   |
| Median                                                                | 1               | 1                           | 1           | 1                 |
| Q1, Q3                                                                | 0, 1            | 0, 2                        | 0, 2        | 0, 2              |
| <b>Motorcycle</b>                                                     |                 |                             |             |                   |
| Median                                                                | 0               | 0                           | 0           | 0                 |
| Q1, Q3                                                                | 0, 0            | 0, 0                        | 0, 1        | 0, 0              |
| <b>Tractor</b>                                                        |                 |                             |             |                   |
| Median                                                                | 0               | 0                           | 0           | 0                 |
| Q1, Q3                                                                | 0, 0            | 0, 0                        | 0, 0        | 0, 0              |
| <b>Phone (Fixed or mobile)</b>                                        |                 |                             |             |                   |
| Median                                                                | 2               | 2                           | 2           | 2                 |
| Q1, Q3                                                                | 1, 3            | 1, 2                        | 1, 2        | 1, 3              |
| <b>Store, shop or kiosk</b>                                           |                 |                             |             |                   |
| Median                                                                | 0               | 0                           | 0           | 0                 |
| Q1, Q3                                                                | 0, 0            | 0, 0                        | 0, 0        | 0, 0              |

|                                                                                                        |             |             |             |              |
|--------------------------------------------------------------------------------------------------------|-------------|-------------|-------------|--------------|
| <b>Commercial vehicle</b>                                                                              |             |             |             |              |
| Median                                                                                                 | 0           | 0           | 0           | 0            |
| Q1, Q3                                                                                                 | 0, 0        | 0, 0        | 0, 0        | 0, 0         |
| <b>Car</b>                                                                                             |             |             |             |              |
| Median                                                                                                 | 0           | 0           | 0           | 0            |
| Q1, Q3                                                                                                 | 0, 0        | 0, 0        | 0, 0        | 0, 0         |
| <b>Electric Iron</b>                                                                                   |             |             |             |              |
| Median                                                                                                 | 0           | 0           | 0           | 0            |
| Q1, Q3                                                                                                 | 0, 0        | 0, 0        | 0, 0        | 0, 0         |
| <b>Fan</b>                                                                                             |             |             |             |              |
| Median                                                                                                 | 0           | 0           | 0           | 0            |
| Q1, Q3                                                                                                 | 0, 0        | 0, 0        | 0, 0        | 0, 0         |
| <b>TV satellite dish</b>                                                                               |             |             |             |              |
| Median                                                                                                 | 0           | 0           | 0           | 0            |
| Q1, Q3                                                                                                 | 0, 0        | 0, 0        | 0, 0        | 0, 0         |
| <b>Computer</b>                                                                                        |             |             |             |              |
| Median                                                                                                 | 0           | 0           | 0           | 0            |
| Q1, Q3                                                                                                 | 0, 0        | 0, 0        | 0, 0        | 0, 0         |
| <b>Sewing machine</b>                                                                                  |             |             |             |              |
| Median                                                                                                 | 0           | 0           | 0           | 0            |
| Q1, Q3                                                                                                 | 0, 1        | 0, 1        | 0, 1        | 0, 1         |
| <b>Air conditioner</b>                                                                                 |             |             |             |              |
| Median                                                                                                 | 0           | 0           | 0           | 0            |
| Q1, Q3                                                                                                 | 0, 0        | 0, 0        | 0, 0        | 0, 0         |
| <b>Do you own any land?</b>                                                                            |             |             |             |              |
| No                                                                                                     | 167 (40.3%) | 151 (35.1%) | 97 (32.3%)  | 415 (36.3%)  |
| Yes                                                                                                    | 247 (59.7%) | 279 (64.9%) | 203 (67.7%) | 729 (63.7%)  |
| <b>What is the main source of drinking water for members of your household?</b>                        |             |             |             |              |
| Stream/river, rain water, lake/dam/pond, or other                                                      | 141 (34.1%) | 128 (29.8%) | 71 (23.7%)  | 340 (29.7%)  |
| Open well                                                                                              | 2 (0.5%)    | 12 (2.8%)   | 55 (18.3%)  | 69 (6.0%)    |
| Public tap, hand pump/closed bore hold, closed well, or water truck                                    | 264 (63.8%) | 290 (67.4%) | 165 (55.0%) | 719 (62.8%)  |
| Piped into home, sachet/ "pure water," or bottled water                                                | 7 (1.7%)    | 0 (0.0%)    | 9 (3.0%)    | 16 (1.4%)    |
| <b>Does anyone in the household own their own farm?</b>                                                |             |             |             |              |
| No                                                                                                     | 110 (26.6%) | 83 (19.3%)  | 81 (27.0%)  | 274 (24.0%)  |
| Yes                                                                                                    | 304 (73.4%) | 347 (80.7%) | 219 (73.0%) | 870 (76.0%)  |
| <b>What kind of toilet facility does your household have?</b>                                          |             |             |             |              |
| Open fields or other                                                                                   | 269 (65.0%) | 229 (53.3%) | 192 (64.0%) | 690 (60.3%)  |
| Ventilated improved pit, other pit latrine, defecates in house and transfers elsewhere                 | 144 (34.8%) | 201 (46.7%) | 107 (35.7%) | 452 (39.5%)  |
| Flush latrine or wash closet                                                                           | 1 (0.2%)    | 0 (0.0%)    | 1 (0.3%)    | 2 (0.2%)     |
| <b>Do you own/rent the house you live in, or have another type of arrangement, such as "perching?"</b> |             |             |             |              |
| Perching or other                                                                                      | 0 (0.0%)    | 2 (0.5%)    | 1 (0.3%)    | 3 (0.3%)     |
| Family/relation house or house provided rent free                                                      | 171 (41.3%) | 147 (34.2%) | 96 (32.0%)  | 414 (36.2%)  |
| Renting                                                                                                | 58 (14.0%)  | 43 (10.0%)  | 23 (7.7%)   | 124 (10.8%)  |
| Joint ownership                                                                                        | 7 (1.7%)    | 12 (2.8%)   | 3 (1.0%)    | 22 (1.9%)    |
| Sole ownership                                                                                         | 178 (43.0%) | 226 (52.6%) | 177 (59.0%) | 581 (50.8%)  |
| <b>What materials are used in the construction of the house?</b>                                       |             |             |             |              |
| <b>Floor of sleeping room</b>                                                                          |             |             |             |              |
| Mud, clay or other                                                                                     | 26 (6.3%)   | 17 (4.0%)   | 24 (8.0%)   | 67 (5.9%)    |
| Cement                                                                                                 | 388 (93.7%) | 413 (96.0%) | 276 (92.0%) | 1077 (94.1%) |
| <b>Roof of sleeping room</b>                                                                           |             |             |             |              |
| Thatch, mud, wood or other                                                                             | 169 (40.8%) | 149 (34.7%) | 117 (39.0%) | 435 (38.0%)  |
| Metal, asbestos                                                                                        | 245 (59.2%) | 281 (65.3%) | 183 (61.0%) | 709 (62.0%)  |

**Walls of sleeping room**

|            |             |             |             |             |
|------------|-------------|-------------|-------------|-------------|
| Mud, other | 170 (41.1%) | 138 (32.1%) | 143 (47.7%) | 451 (39.4%) |
| Cement     | 244 (58.9%) | 292 (67.9%) | 157 (52.3%) | 693 (60.6%) |

**Does the household have a separate room for cooking?**

|     |             |             |             |             |
|-----|-------------|-------------|-------------|-------------|
| No  | 227 (54.8%) | 213 (49.5%) | 176 (58.7%) | 616 (53.8%) |
| Yes | 187 (45.2%) | 217 (50.5%) | 124 (41.3%) | 528 (46.2%) |

**Does the household have a domestic worker not related to the household head?**

|     |             |             |             |              |
|-----|-------------|-------------|-------------|--------------|
| No  | 404 (97.6%) | 409 (95.1%) | 290 (96.7%) | 1103 (96.4%) |
| Yes | 10 (2.4%)   | 21 (4.9%)   | 10 (3.3%)   | 41 (3.6%)    |

This table presents the household characteristics used in the construction of the wealth index. Continuous variables were centered and standardized. All variables were then included in a principal component analysis where the first principal component describes the wealth index.

**Table S2. Distribution of anthropometric measurements by age, for all children and by study arm**

|                                        | Control (N=414) | Improved Biomass<br>(N=430) | LPG (N=300)   | Total (N=1144) |
|----------------------------------------|-----------------|-----------------------------|---------------|----------------|
| <b>Birth Weight, kilograms</b>         |                 |                             |               |                |
| Birth                                  |                 |                             |               |                |
| Mean (SD)                              | 2.91 (0.46)     | 2.92 (0.45)                 | 2.89 (0.47)   | 2.91 (0.46)    |
| Range                                  | 1.08 – 4.40     | 1.65 – 4.24                 | 1.50 – 4.70   | 1.08 – 4.70    |
| Three Months                           |                 |                             |               |                |
| Mean (SD)                              | 5.97 (0.93)     | 6.02 (0.91)                 | 5.99 (0.87)   | 5.99 (0.91)    |
| Range                                  | 2.28 – 9.44     | 2.67 – 9.75                 | 3.10 – 8.70   | 2.28 – 9.75    |
| Six Months                             |                 |                             |               |                |
| Mean (SD)                              | 7.20 (1.00)     | 7.17 (0.96)                 | 7.17 (1.01)   | 7.18 (0.99)    |
| Range                                  | 4.08 – 10.12    | 4.60 – 10.36                | 4.58 – 10.40  | 4.08 – 10.40   |
| Nine Months                            |                 |                             |               |                |
| Mean (SD)                              | 7.84 (1.11)     | 7.84 (1.04)                 | 7.91 (1.03)   | 7.86 (1.06)    |
| Range                                  | 4.31 – 10.80    | 5.11 – 12.57                | 4.64 – 11.42  | 4.31 – 12.57   |
| Twelve Months                          |                 |                             |               |                |
| Mean (SD)                              | 8.48 (1.09)     | 8.50 (1.10)                 | 8.48 (1.06)   | 8.48 (1.08)    |
| Range                                  | 5.11 – 11.87    | 5.82 – 13.15                | 4.69 – 12.27  | 4.69 – 13.15   |
| <b>Length, meters</b>                  |                 |                             |               |                |
| Birth                                  |                 |                             |               |                |
| Mean (SD)                              | 0.47 (0.04)     | 0.46 (0.05)                 | 0.45 (0.06)   | 0.46 (0.05)    |
| Range                                  | 0.14 - 0.57     | 0.14 - 0.64                 | 0.15 - 0.57   | 0.14 - 0.64    |
| Three Months                           |                 |                             |               |                |
| Mean (SD)                              | 0.59 (0.04)     | 0.59 (0.03)                 | 0.59 (0.04)   | 0.59 (0.04)    |
| Range                                  | 0.43 - 0.70     | 0.46 - 0.72                 | 0.46 - 0.69   | 0.43 - 0.72    |
| Six Months                             |                 |                             |               |                |
| Mean (SD)                              | 0.65 (0.04)     | 0.65 (0.03)                 | 0.65 (0.03)   | 0.65 (0.04)    |
| Range                                  | 0.52 - 0.74     | 0.51 - 0.77                 | 0.54 - 0.74   | 0.51 - 0.77    |
| Nine Months                            |                 |                             |               |                |
| Mean (SD)                              | 0.69 (0.03)     | 0.69 (0.03)                 | 0.69 (0.03)   | 0.69 (0.03)    |
| Range                                  | 0.55 - 0.78     | 0.56 - 0.79                 | 0.61 - 0.78   | 0.55 - 0.79    |
| Twelve Months                          |                 |                             |               |                |
| Mean (SD)                              | 0.73 (0.03)     | 0.73 (0.03)                 | 0.73 (0.03)   | 0.73 (0.03)    |
| Range                                  | 0.60 - 0.81     | 0.62 - 0.88                 | 0.64 - 0.81   | 0.60 - 0.88    |
| <b>Head Circumference, centimeters</b> |                 |                             |               |                |
| Birth                                  |                 |                             |               |                |
| Mean (SD)                              | 33.38 (2.26)    | 33.86 (2.60)                | 33.58 (2.52)  | 33.61 (2.47)   |
| Range                                  | 25.00 - 43.80   | 26.50 - 45.00               | 25.00 - 47.50 | 25.00 - 47.50  |
| Three Months                           |                 |                             |               |                |
| Mean (SD)                              | 40.04 (2.31)    | 40.43 (1.98)                | 40.50 (2.04)  | 40.31 (2.13)   |
| Range                                  | 32.00 - 49.00   | 30.00 - 47.00               | 34.00 - 48.60 | 30.00 - 49.00  |
| Six Months                             |                 |                             |               |                |

|                                                 |               |               |               |               |
|-------------------------------------------------|---------------|---------------|---------------|---------------|
| Mean (SD)                                       | 42.49 (2.00)  | 42.76 (1.61)  | 42.79 (1.89)  | 42.66 (1.85)  |
| Range                                           | 34.20 - 48.00 | 33.50 - 48.00 | 30.00 - 52.30 | 30.00 - 52.30 |
| Nine Months                                     |               |               |               |               |
| Mean (SD)                                       | 43.85 (1.58)  | 44.11 (1.57)  | 44.33 (1.53)  | 44.07 (1.58)  |
| Range                                           | 38.50 - 48.30 | 38.00 - 48.20 | 35.00 - 50.00 | 35.00 - 50.00 |
| Twelve Months                                   |               |               |               |               |
| Mean (SD)                                       | 45.01 (1.57)  | 45.13 (1.61)  | 45.47 (1.42)  | 45.19 (1.55)  |
| Range                                           | 39.70 - 51.50 | 34.00 - 49.10 | 41.00 - 50.50 | 34.00 - 51.50 |
| <b>Mid-Upper Arm Circumference, centimeters</b> |               |               |               |               |
| Birth                                           |               |               |               |               |
| Mean (SD)                                       | 11.37 (1.24)  | 11.28 (1.40)  | 11.3 (1.6)    | 11.32 (1.4)   |
| Range                                           | 8.00 - 16.00  | 4.00 - 17.10  | 4.50 - 21.00  | 4.00 - 21.00  |
| Three Months                                    |               |               |               |               |
| Mean (SD)                                       | 14.08 (1.48)  | 14.10 (1.43)  | 14.52 (1.53)  | 14.21 (1.49)  |
| Range                                           | 10.00 - 18.60 | 8.60 - 18.20  | 10.00 - 21.10 | 8.60 - 21.10  |
| Six Months                                      |               |               |               |               |
| Mean (SD)                                       | 14.61 (1.43)  | 14.68 (1.34)  | 15.01 (1.36)  | 14.74 (1.39)  |
| Range                                           | 10.80 - 19.00 | 11.40 - 20.10 | 11.40 - 19.00 | 10.80 - 20.10 |
| Nine Months                                     |               |               |               |               |
| Mean (SD)                                       | 14.69 (1.34)  | 14.84 (1.37)  | 15.24 (1.35)  | 14.9 (1.37)   |
| Range                                           | 11.00 - 18.90 | 10.90 - 19.20 | 10.70 - 19.00 | 10.70 - 19.20 |
| Twelve Months                                   |               |               |               |               |
| Mean (SD)                                       | 14.94 (1.52)  | 15.02 (1.37)  | 15.34 (1.33)  | 15.09 (1.42)  |
| Range                                           | 11.50 - 19.70 | 11.10 - 20.00 | 11.50 - 19.00 | 11.10 - 20.00 |
| <b>Length-for-Age Z-score</b>                   |               |               |               |               |
| Three Months                                    |               |               |               |               |
| Mean (SD)                                       | -0.65 (1.70)  | -0.62 (1.46)  | -0.59 (1.58)  | -0.62 (1.58)  |
| Range                                           | -4.94 - 4.38  | -4.50 - 4.91  | -4.99 - 4.38  | -4.99 - 4.91  |
| Six Months                                      |               |               |               |               |
| Mean (SD)                                       | -0.66 (1.57)  | -0.77 (1.49)  | -0.81 (1.53)  | -0.74 (1.53)  |
| Range                                           | -4.97 - 3.20  | -4.97 - 4.46  | -4.65 - 3.42  | -4.97 - 4.46  |
| Nine Months                                     |               |               |               |               |
| Mean (SD)                                       | -0.81 (1.33)  | -0.90 (1.40)  | -0.73 (1.30)  | -0.82 (1.35)  |
| Range                                           | -4.89 - 3.04  | -4.74 - 3.54  | -4.44 - 2.63  | -4.89 - 3.54  |
| Twelve Months                                   |               |               |               |               |
| Mean (SD)                                       | -0.81 (1.32)  | -0.97 (1.15)  | -0.76 (1.1)   | -0.85 (1.19)  |
| Range                                           | -4.94 - 2.72  | -4.69 - 2.00  | -3.73 - 2.00  | -4.94 - 2.72  |
| <b>Weight-for-Age Z-score</b>                   |               |               |               |               |
| Three Months                                    |               |               |               |               |
| Mean (SD)                                       | -0.23 (1.19)  | -0.23 (1.19)  | -0.24 (1.19)  | -0.23 (1.19)  |
| Range                                           | -4.74 - 3.94  | -4.28 - 4.25  | -4.63 - 2.73  | -4.74 - 4.25  |
| Six Months                                      |               |               |               |               |
| Mean (SD)                                       | -0.56 (1.17)  | -0.66 (1.13)  | -0.60 (1.20)  | -0.60 (1.16)  |
| Range                                           | -4.96 - 2.38  | -4.28 - 2.47  | -4.61 - 2.51  | -4.96 - 2.51  |



|                                  |              |              |              |               |
|----------------------------------|--------------|--------------|--------------|---------------|
| Nine Months                      |              |              |              |               |
| Mean (SD)                        | -0.81 (1.15) | -0.89 (1.14) | -0.75 (1.13) | -0.82 (1.14)  |
| Range                            | -4.67 - 2.19 | -3.98 - 3.24 | -4.57 - 2.32 | -4.67 - 3.24  |
| Twelve Months                    |              |              |              |               |
| Mean (SD)                        | -0.85 (1.09) | -0.89 (1.10) | -0.86 (1.05) | -0.87 (1.08)  |
| Range                            | -4.74 - 2.24 | -4.08 - 3.02 | -4.08 - 2.22 | -4.74 - 3.02  |
| <b>Weight-for-Length Z-score</b> |              |              |              |               |
| Three Months                     |              |              |              |               |
| Mean (SD)                        | 0.50 (1.74)  | 0.39 (1.55)  | 0.42 (1.72)  | 0.43 (1.66)   |
| Range                            | -4.47 - 4.75 | -4.99 - 4.71 | -4.09 - 4.80 | -4.99 - 4.80  |
| Six Months                       |              |              |              |               |
| Mean (SD)                        | 0.06 (1.57)  | -0.09 (1.38) | 0.04 (1.50)  | -0.003 (1.49) |
| Range                            | -4.20 - 4.57 | -4.86 - 4.22 | -4.45 - 4.25 | -4.86 - 4.57  |
| Nine Months                      |              |              |              |               |
| Mean (SD)                        | -0.35 (1.46) | -0.43 (1.35) | -0.39 (1.25) | -0.39 (1.36)  |
| Range                            | -4.01 - 4.84 | -4.94 - 4.41 | -4.69 - 2.85 | -4.94 - 4.84  |
| Twelve Months                    |              |              |              |               |
| Mean (SD)                        | -0.56 (1.33) | -0.56 (1.21) | -0.65 (1.14) | -0.59 (1.23)  |
| Range                            | -4.26 - 3.55 | -4.76 - 3.40 | -4.84 - 3.43 | -4.84 - 3.55  |

---

**Table S3. Fit statistics for latent class growth analysis**

| Variable/ number of classes        | AIC     | BIC     | Entropy | Number of individuals in each class |     |     |     |    |    |  |
|------------------------------------|---------|---------|---------|-------------------------------------|-----|-----|-----|----|----|--|
|                                    |         |         |         | 1                                   | 2   | 3   | 4   | 5  | 6  |  |
| <i>Anthropometric measurements</i> |         |         |         |                                     |     |     |     |    |    |  |
| <b>Weight</b>                      |         |         |         |                                     |     |     |     |    |    |  |
| 2                                  | 11540.5 | 11601.0 | 0.75    | 473                                 | 671 |     |     |    |    |  |
| 3                                  | 10963.2 | 11043.9 | 0.78    | 325                                 | 623 | 196 |     |    |    |  |
| 4 <sup>a</sup>                     | 10678.9 | 10779.8 | 0.79    | 356                                 | 526 | 204 | 58  |    |    |  |
| 5                                  | 10524.3 | 10645.3 | 0.78    | 410                                 | 413 | 173 | 124 | 24 |    |  |
| 6                                  | 10416.4 | 10557.6 | 0.79    | 315                                 | 419 | 227 | 126 | 41 | 16 |  |
| <b>Length</b>                      |         |         |         |                                     |     |     |     |    |    |  |
| 2                                  | 27029.6 | 27090.1 | 0.66    | 368                                 | 776 |     |     |    |    |  |
| 3 <sup>a</sup>                     | 26686.6 | 26767.2 | 0.73    | 249                                 | 759 | 136 |     |    |    |  |
| 4                                  | 26491.2 | 26592.2 | 0.76    | 263                                 | 695 | 157 | 29  |    |    |  |
| 5                                  | 26450.8 | 26571.9 | 0.68    | 389                                 | 479 | 163 | 86  | 27 |    |  |
| 6                                  | 26068.7 | 26209.9 | 0.81    | 261                                 | 676 | 156 | 20  | 14 | 17 |  |
| <b>Head circumference</b>          |         |         |         |                                     |     |     |     |    |    |  |
| 2                                  | 20267.5 | 20328.0 | 0.65    | 784                                 | 360 |     |     |    |    |  |
| 3 <sup>a</sup>                     | 19885.6 | 19966.3 | 0.74    | 695                                 | 380 | 69  |     |    |    |  |
| 4                                  | 19731.0 | 19831.9 | 0.74    | 597                                 | 420 | 76  | 51  |    |    |  |
| 5                                  | 19655.3 | 19776.3 | 0.77    | 555                                 | 449 | 70  | 59  | 11 |    |  |
| 6                                  | 19599.3 | 19740.4 | 0.78    | 513                                 | 476 | 71  | 69  | 10 | 5  |  |
| <b>MUAC</b>                        |         |         |         |                                     |     |     |     |    |    |  |
| 2                                  | 17090.2 | 17150.7 | 0.69    | 749                                 | 395 |     |     |    |    |  |
| 3                                  | 16743.3 | 16824.0 | 0.72    | 661                                 | 348 | 135 |     |    |    |  |
| 4 <sup>a</sup>                     | 16630.9 | 16731.8 | 0.72    | 598                                 | 283 | 216 | 47  |    |    |  |
| 5                                  | 16577.6 | 16698.6 | 0.73    | 519                                 | 353 | 210 | 40  | 22 |    |  |
| 6                                  | 16552.0 | 16693.2 | 0.68    | 457                                 | 357 | 170 | 45  | 20 | 95 |  |
| <i>Z-scores</i>                    |         |         |         |                                     |     |     |     |    |    |  |
| <b>Weight for length</b>           |         |         |         |                                     |     |     |     |    |    |  |
| 2                                  | 13091.0 | 13146.3 | 0.60    | 649                                 | 478 |     |     |    |    |  |
| 3                                  | 12868.4 | 12943.8 | 0.69    | 718                                 | 289 | 120 |     |    |    |  |
| 4 <sup>a</sup>                     | 12781.5 | 12877.0 | 0.71    | 531                                 | 474 | 76  | 46  |    |    |  |
| 5                                  | 12756.3 | 12871.9 | 0.74    | 520                                 | 460 | 83  | 41  | 23 |    |  |
| 6                                  | 12734.5 | 12870.3 | 0.73    | 545                                 | 371 | 141 | 36  | 19 | 15 |  |
| <b>Length for age</b>              |         |         |         |                                     |     |     |     |    |    |  |
| 2                                  | 12672.6 | 12727.9 | 0.66    | 583                                 | 544 |     |     |    |    |  |
| 3                                  | 12285.6 | 12361.0 | 0.75    | 669                                 | 311 | 147 |     |    |    |  |
| 4 <sup>a</sup>                     | 12186.8 | 12282.3 | 0.72    | 501                                 | 423 | 115 | 88  |    |    |  |
| 5                                  | 12148.4 | 12264.1 | 0.70    | 540                                 | 306 | 167 | 62  | 52 |    |  |
| 6                                  | 12109.7 | 12245.5 | 0.72    | 508                                 | 289 | 182 | 72  | 57 | 19 |  |
| <b>Weight for age</b>              |         |         |         |                                     |     |     |     |    |    |  |
| 2                                  | 10573.8 | 10629.1 | 0.78    | 598                                 | 532 |     |     |    |    |  |
| 3                                  | 9964.0  | 10039.4 | 0.79    | 592                                 | 302 | 236 |     |    |    |  |
| 4 <sup>a</sup>                     | 9578.1  | 9673.6  | 0.82    | 467                                 | 442 | 125 | 96  |    |    |  |
| 5                                  | 9388.2  | 9503.8  | 0.81    | 426                                 | 348 | 233 | 76  | 47 |    |  |
| 6                                  | 9316.8  | 9452.6  | 0.78    | 341                                 | 329 | 251 | 127 | 57 | 25 |  |

Note:

---

<sup>a</sup> Denotes the optimal number of classes for each metric

MUAC = mid upper arm circumference, AIC = Akaike information criterion, BIC = Bayesian information criterion.

---

**Table S4. Posterior probabilities by trajectory assignment**

|                                    | Heaviest<br>(N=58)    | Heavy-<br>Moderate<br>(N=356) | Light-Moderate<br>(N=526)             | Lightest<br>(N=204)    | Total<br>(N=1144) |
|------------------------------------|-----------------------|-------------------------------|---------------------------------------|------------------------|-------------------|
| <b>Weight</b>                      |                       |                               |                                       |                        |                   |
| Median                             | 0.98                  | 0.94                          | 0.94                                  | 0.97                   | 0.95              |
| Q1, Q3                             | 0.81, 1.00            | 0.81, 0.99                    | 0.79, 0.99                            | 0.82, 1.00             | 0.80, 0.99        |
| Range                              | 0.52 - 1.00           | 0.49 - 1.00                   | 0.45 - 1.00                           | 0.51 - 1.00            | 0.45 - 1.00       |
| <b>Length</b>                      | Longest<br>(N=249)    | Moderate<br>(N=759)           | Shortest<br>(N=136)                   |                        | Total<br>(N=1144) |
| Median                             | 0.94                  | 0.94                          | 0.96                                  |                        | 0.94              |
| Q1, Q3                             | 0.75, 0.99            | 0.79, 0.99                    | 0.81, 1.00                            |                        | 0.77, 0.99        |
| Range                              | 0.50 - 1.00           | 0.50 - 1.00                   | 0.51 - 1.00                           |                        | 0.50 - 1.00       |
| <b>Mid-Upper Arm Circumference</b> | Largest<br>(N=47)     | Large-<br>Moderate<br>(N=283) | Small-Moderate<br>(N=598)             | Smallest<br>(N=216)    | Total<br>(N=1144) |
| Median                             | 0.92                  | 0.88                          | 0.86                                  | 0.91                   | 0.88              |
| Q1, Q3                             | 0.70, 1.00            | 0.71, 0.96                    | 0.71, 0.96                            | 0.76, 0.99             | 0.72, 0.96        |
| Range                              | 0.50 - 1.00           | 0.45 - 0.99                   | 0.47 - 0.99                           | 0.51 - 1.00            | 0.45 - 1.00       |
| <b>Head Circumference</b>          | Largest<br>(N=380)    | Medium<br>(N=695)             | Smallest<br>(N=69)                    |                        | Total<br>(N=1144) |
| Median                             | 0.91                  | 0.95                          | 0.99                                  |                        | 0.94              |
| Q1, Q3                             | 0.76, 0.99            | 0.81, 0.99                    | 0.87, 1.00                            |                        | 0.79, 0.99        |
| Range                              | 0.50 - 1.00           | 0.50 - 1.00                   | 0.53 - 1.00                           |                        | 0.50 - 1.00       |
| <b>Weight-for-age z-score</b>      | Normal-High<br>(N=96) | Normal<br>(N=467)             | At-risk for<br>underweight<br>(N=442) | Underweight<br>(N=125) | Total<br>(N=1130) |
| Median                             | 0.99                  | 0.97                          | 0.97                                  | 0.99                   | 0.97              |
| Q1, Q3                             | 0.90, 1.00            | 0.83, 0.99                    | 0.80, 0.99                            | 0.85, 1.00             | 0.83, 0.99        |
| Range                              | 0.53 - 1.00           | 0.49 - 1.00                   | 0.50 - 1.00                           | 0.55 - 1.00            | 0.49 - 1.00       |
| <b>Length-for-age z-score</b>      | Normal-High<br>(N=88) | Normal<br>(N=423)             | At risk for<br>stunting<br>(N=501)    | Stunted<br>(N=115)     | Total<br>(N=1127) |
| Median                             | 0.92                  | 0.84                          | 0.90                                  | 0.97                   | 0.89              |
| Q1, Q3                             | 0.70, 0.99            | 0.66, 0.94                    | 0.74, 0.97                            | 0.83, 1.00             | 0.71, 0.96        |
| Range                              | 0.50 - 1.00           | 0.45 - 0.98                   | 0.46 - 0.99                           | 0.51 - 1.00            | 0.45 - 1.00       |
| <b>Weight-for-length z-score</b>   | Overweight<br>(N=76)  | Normal<br>(N=531)             | At-risk for<br>wasting<br>(N=474)     | Wasted<br>(N=46)       | Total<br>(N=1127) |
| Median                             | 0.96                  | 0.88                          | 0.89                                  | 0.91                   | 0.89              |
| Q1, Q3                             | 0.78, 1.00            | 0.73, 0.96                    | 0.70, 0.96                            | 0.70, 0.99             | 0.72, 0.96        |
| Range                              | 0.51 - 1.00           | 0.48 - 0.99                   | 0.50 - 0.99                           | 0.52 - 1.00            | 0.48 - 1.00       |

Note: All trajectories include 4 groups except length (3 groups) and head circumference (3 groups).

**Table S5. Associations between prenatal and postnatal average carbon monoxide (CO) and growth trajectories: Complete model output**

| Variable                            | Weight |            |         | Length |            |    |         |
|-------------------------------------|--------|------------|---------|--------|------------|----|---------|
|                                     | OR     | 95% CI     | p-value | OR     | LL         | UL | p-value |
| Prenatal CO, per 1 ppm <sup>a</sup> | 1.03   | 0.93, 1.14 | 0.59    | 1.17   | 1.01, 1.35 |    | 0.04    |
| Child CO, per 1 ppm <sup>a</sup>    | 1.01   | 0.94, 1.08 | 0.84    | 1.03   | 0.96, 1.1  |    | 0.41    |
| Maternal age                        | 0.99   | 0.98, 1.01 | 0.24    | 0.99   | 0.97, 1.01 |    | 0.37    |
| Ethnicity 1 vs 0                    | 1.36   | 0.90, 2.06 | 0.15    | 1.01   | 0.46, 2.21 |    | 0.99    |
| Ethnicity 2 vs 0                    | 2.27   | 1.42, 3.61 | <0.01   | 1.73   | 0.91, 3.32 |    | 0.10    |
| Ethnicity 3 vs 0                    | 1.06   | 0.75, 1.50 | 0.74    | 0.84   | 0.53, 1.35 |    | 0.47    |
| Ethnicity 4 vs 0                    | 1.88   | 1.04, 3.39 | 0.04    | 1.85   | 0.76, 4.53 |    | 0.18    |
| Ethnicity 5 vs 0                    | 1.2    | 0.85, 1.69 | 0.3     | 1.07   | 0.67, 1.71 |    | 0.79    |
| Wealth Index 2 vs 1                 | 0.86   | 0.58, 1.27 | 0.44    | 0.88   | 0.54, 1.43 |    | 0.60    |
| Wealth Index 3 vs 1                 | 0.98   | 0.69, 1.39 | 0.92    | 1.12   | 0.73, 1.72 |    | 0.59    |
| Wealth Index 4 vs 1                 | 1.06   | 0.73, 1.52 | 0.76    | 1.09   | 0.72, 1.63 |    | 0.69    |
| Wealth Index 5 vs 1                 | 0.93   | 0.63, 1.36 | 0.69    | 0.96   | 0.59, 1.57 |    | 0.87    |
| Female Sex                          | 2.78   | 2.33, 3.30 | <0.01   | 1.97   | 1.53, 2.55 |    | <0.01   |

| Variable                            | Head Circumference |            |    |         | Mid Upper Arm Circumference |            |    |         |
|-------------------------------------|--------------------|------------|----|---------|-----------------------------|------------|----|---------|
|                                     | OR                 | LL         | UL | p-value | OR                          | LL         | UL | p-value |
| Prenatal CO, per 1 ppm <sup>a</sup> | 1.05               | 0.98, 1.12 |    | 0.19    | 1.07                        | 0.97, 1.19 |    | 0.16    |
| Child CO, per 1 ppm <sup>a</sup>    | 1.09               | 1.04, 1.13 |    | <0.01   | 1.03                        | 0.97, 1.10 |    | 0.35    |
| Maternal age                        | 0.98               | 0.96, 0.99 |    | 0.01    | 1                           | 0.99, 1.02 |    | 0.82    |
| Ethnicity 1 vs 0                    | 0.94               | 0.59, 1.49 |    | 0.79    | 1.54                        | 1.02, 2.32 |    | 0.04    |
| Ethnicity 2 vs 0                    | 1.53               | 0.98, 2.4  |    | 0.06    | 0.86                        | 0.51, 1.46 |    | 0.58    |
| Ethnicity 3 vs 0                    | 0.97               | 0.52, 1.82 |    | 0.93    | 0.84                        | 0.53, 1.32 |    | 0.45    |
| Ethnicity 4 vs 0                    | 1.22               | 0.76, 1.97 |    | 0.41    | 1.16                        | 0.57, 2.35 |    | 0.69    |
| Ethnicity 5 vs 0                    | 0.75               | 0.53, 1.07 |    | 0.11    | 0.74                        | 0.50, 1.09 |    | 0.13    |
| Wealth Index 2 vs 1                 | 0.89               | 0.6, 1.34  |    | 0.59    | 0.85                        | 0.58, 1.24 |    | 0.4     |
| Wealth Index 3 vs 1                 | 1.21               | 0.81, 1.81 |    | 0.36    | 0.95                        | 0.63, 1.42 |    | 0.8     |
| Wealth Index 4 vs 1                 | 0.89               | 0.56, 1.41 |    | 0.62    | 0.98                        | 0.66, 1.47 |    | 0.94    |
| Wealth Index 5 vs 1                 | 1                  | 0.6, 1.66  |    | 0.99    | 1.01                        | 0.67, 1.54 |    | 0.95    |
| Female Sex                          | 2.92               | 2.22, 3.84 |    | <0.01   | 1.89                        | 1.51, 2.37 |    | <0.01   |

| Variable                            | Length-for-Age Z-score |            |    |         | Weight-for-Age Z-score |            |    |         |
|-------------------------------------|------------------------|------------|----|---------|------------------------|------------|----|---------|
|                                     | OR                     | LL         | UL | p-value | OR                     | LL         | UL | p-value |
| Prenatal CO, per 1 ppm <sup>a</sup> | 1.15                   | 1.01, 1.32 |    | 0.03    | 1.00                   | 0.87, 1.14 |    | 0.94    |
| Child CO, per 1 ppm <sup>a</sup>    | 0.98                   | 0.94, 1.02 |    | 0.25    | 1.00                   | 0.93, 1.08 |    | 0.93    |
| Maternal age                        | 0.99                   | 0.98, 1.01 |    | 0.50    | 1.00                   | 0.98, 1.01 |    | 0.56    |

|                     |      |            |       |      |            |       |
|---------------------|------|------------|-------|------|------------|-------|
| Ethnicity 1 vs 0    | 1.10 | 0.57, 2.14 | 0.78  | 1.33 | 0.93, 1.89 | 0.11  |
| Ethnicity 2 vs 0    | 1.41 | 0.83, 2.4  | 0.21  | 2.15 | 1.52, 3.05 | <0.01 |
| Ethnicity 3 vs 0    | 0.81 | 0.55, 1.18 | 0.27  | 1.14 | 0.79, 1.64 | 0.48  |
| Ethnicity 4 vs 0    | 1.68 | 0.74, 3.77 | 0.21  | 1.97 | 1.08, 3.62 | 0.03  |
| Ethnicity 5 vs 0    | 1.02 | 0.69, 1.52 | 0.91  | 1.22 | 0.91, 1.62 | 0.18  |
| Wealth Index 2 vs 1 | 0.85 | 0.59, 1.22 | 0.38  | 0.84 | 0.58, 1.23 | 0.37  |
| Wealth Index 3 vs 1 | 1.20 | 0.83, 1.73 | 0.34  | 0.97 | 0.72, 1.32 | 0.86  |
| Wealth Index 4 vs 1 | 1.14 | 0.77, 1.69 | 0.51  | 0.93 | 0.68, 1.28 | 0.67  |
| Wealth Index 5 vs 1 | 0.90 | 0.55, 1.46 | 0.66  | 0.92 | 0.63, 1.35 | 0.68  |
| Female Sex          | 0.58 | 0.47, 0.71 | <0.01 | 0.76 | 0.63, 0.91 | <0.01 |

Weight-for-length z-score

|                                     | OR   | LL         | UL | p-value |
|-------------------------------------|------|------------|----|---------|
| Prenatal CO, per 1 ppm <sup>a</sup> | 0.95 | 0.85, 1.06 |    | 0.38    |
| Child CO, per 1 ppm <sup>a</sup>    | 0.97 | 0.89, 1.06 |    | 0.49    |
| Maternal age                        | 0.99 | 0.98, 1.01 |    | 0.26    |
| Ethnicity 1 vs 0                    | 1.21 | 0.79, 1.87 |    | 0.38    |
| Ethnicity 2 vs 0                    | 1.90 | 1.00, 3.60 |    | 0.05    |
| Ethnicity 3 vs 0                    | 1.29 | 0.92, 1.81 |    | 0.14    |
| Ethnicity 4 vs 0                    | 1.31 | 0.84, 2.06 |    | 0.23    |
| Ethnicity 5 vs 0                    | 1.20 | 0.77, 1.87 |    | 0.42    |
| Wealth Index 2 vs 1                 | 1.07 | 0.78, 1.46 |    | 0.69    |
| Wealth Index 3 vs 1                 | 0.96 | 0.65, 1.42 |    | 0.84    |
| Wealth Index 4 vs 1                 | 1.00 | 0.69, 1.45 |    | 0.99    |
| Wealth Index 5 vs 1                 | 1.13 | 0.78, 1.64 |    | 0.52    |
| Female Sex                          | 1.04 | 0.81, 1.34 |    | 0.74    |

Note: Analyses are ordinal regression where the ORs may be interpreted as the odds of being in a lower/smaller trajectory per 1ppm increase in average CO exposure. All trajectories include 4 groups except length (3 groups) and head circumference (3 groups).

<sup>a</sup> Per 1 part per million (ppm) increase in average CO exposure, all effects determined with cluster-robust standard errors. All multivariable models include both prenatal and postnatal average CO exposure and adjust for child sex, maternal age, ethnicity, and wealth index.

**Table S6. Associations between prenatal and postnatal average carbon monoxide (CO) and growth trajectories: Ordinal regression sensitivity models**

| Trajectory Measurement <sup>a</sup> | N     | <u>Multivariable Model +Maternal BMI at enrollment</u>  |          |                    |          | N     | <u>Multivariable Model +Breastfeeding Duration</u>   |          |                    |          |
|-------------------------------------|-------|---------------------------------------------------------|----------|--------------------|----------|-------|------------------------------------------------------|----------|--------------------|----------|
|                                     |       | Prenatal                                                |          | Postnatal          |          |       | Prenatal                                             |          | Postnatal          |          |
|                                     |       | <i>OR (95% CI)</i>                                      | <i>p</i> | <i>OR (95% CI)</i> | <i>p</i> |       | <i>OR (95% CI)</i>                                   | <i>p</i> | <i>OR (95% CI)</i> | <i>p</i> |
| Weight                              | 1,142 | 1.09 (0.77-1.14)                                        | 0.63     | 1.01 (0.95-1.08)   | 0.66     | 1,139 | 1.03 (0.93-1.14)                                     | 0.53     | 1.00 (0.93-1.08)   | 0.92     |
| Length                              | 1,142 | 1.17 (1.01-1.35)                                        | 0.04     | 1.03 (0.96-1.11)   | 0.38     | 1,139 | 1.16 (1.00-1.35)                                     | 0.04     | 1.03 (0.96-1.11)   | 0.39     |
| Head circumference                  | 1,142 | 1.05 (0.98-1.12)                                        | 0.44     | 1.09 (1.04-1.14)   | 0.001    | 1,139 | 1.05 (0.97-1.13)                                     | 0.19     | 1.08 (1.04-1.13)   | <.001    |
| MUAC                                | 1,142 | 1.08 (0.98-1.19)                                        | 0.13     | 1.03 (0.97-1.10)   | 0.29     | 1,139 | 1.09 (0.99-1.21)                                     | 0.09     | 1.02 (0.95-1.09)   | 0.55     |
| Weight for length z-score           | 1,125 | 0.96 (0.86-1.06)                                        | 0.40     | 0.97 (0.90-1.06)   | 0.53     | 1,125 | 0.96 (0.87-1.07)                                     | 0.47     | 0.96 (0.89-1.05)   | 0.38     |
| Length for age z-score              | 1,125 | 1.15 (1.01-1.32)                                        | 0.03     | 0.98 (0.94-1.02)   | 0.27     | 1,125 | 1.15 (1.01-1.32)                                     | 0.04     | 0.98 (0.94-1.01)   | 0.22     |
| Weight for age z-score              | 1,128 | 1.00 (0.88-1.13)                                        | 0.96     | 1.01 (0.93-1.09)   | 0.86     | 1,128 | 1.01 (0.89-1.14)                                     | 0.92     | 0.99 (0.92-1.07)   | 0.87     |
|                                     | N     | <u>Multivariable Model +Gestational Age at Delivery</u> |          |                    |          | N     | <u>Multivariable Model +Birth weight<sup>b</sup></u> |          |                    |          |
|                                     |       | Prenatal                                                |          | Postnatal          |          |       | Prenatal                                             |          | Postnatal          |          |
|                                     |       | <i>OR (95% CI)</i>                                      | <i>p</i> | <i>OR (95% CI)</i> | <i>p</i> |       | <i>OR (95% CI)</i>                                   | <i>p</i> | <i>OR (95% CI)</i> | <i>p</i> |
| Weight                              | 1,142 | 1.02 (0.92-1.14)                                        | 0.67     | 1.00 (0.93-1.08)   | 0.99     |       | --                                                   | --       | --                 | --       |
| Length                              | 1,142 | 1.17 (1.01-1.35)                                        | 0.03     | 1.02 (0.94-1.10)   | 0.68     | 1,138 | 1.16 (1.02-1.32)                                     | 0.02     | 1.02 (0.96-1.09)   | 0.46     |
| Head circumference                  | 1,142 | 1.04 (0.97-1.11)                                        | 0.31     | 1.07 (1.02-1.12)   | 0.003    | 1,138 | 1.03 (0.94-1.13)                                     | 0.51     | 1.09 (1.03-1.15)   | 0.003    |
| MUAC                                | 1,142 | 1.07 (0.97-1.19)                                        | 0.17     | 1.03 (0.97-1.10)   | 0.38     | 1,138 | 1.05 (0.95-1.16)                                     | 0.30     | 1.03 (0.96-1.10)   | 0.43     |
| Weight for length z-score           | 1,125 | 0.95 (0.86-1.06)                                        | 0.39     | 0.97 (0.89-1.06)   | 0.51     | 1,121 | 0.93 (0.82-1.05)                                     | 0.24     | 0.97 (0.90-1.04)   | 0.41     |
| Length for age z-score              | 1,125 | 1.15 (1.01-1.31)                                        | 0.04     | 0.97 (0.93-1.00)   | 0.07     | 1,121 | 1.13 (1.00-1.27)                                     | 0.048    | 0.97 (0.92-1.02)   | 0.30     |
| Weight for age z-score              | 1,128 | 0.99 (0.86-1.14)                                        | 0.89     | 1.00 (0.92-1.08)   | 0.93     | 1,120 | 0.95 (0.78-1.14)                                     | 0.61     | 1.00 (0.94-1.06)   | 0.91     |

Note: Per 1 part per million increase in average CO exposure. Analyses are ordinal regression where ORs may be interpreted as the odds of being in a lower/smaller trajectory per 1ppm increase in average CO exposure. Multivariable models include both prenatal and postnatal average CO exposure and adjust for child sex, maternal age, ethnicity, and wealth index with additional adjustment for maternal BMI, breastfeeding duration, gestational age at delivery or birthweight as indicated

<sup>a</sup> All trajectories include 4 groups except length (3 groups) and head circumference (3 groups).

<sup>b</sup> Additional adjustment for birthweight not done for weight trajectory, as birth weight is used in the construction of this trajectory

MUAC = mid upper arm circumference, BMI = body mass index

**Table S7: Sex-specific associations between prenatal and postnatal average carbon monoxide (CO) exposure and growth trajectories: Ordinal regression**

| Trajectory <sup>a</sup>   | Child Sex | N   | Bivariate Model   |      | Bivariate Model   |       | Multivariable Model |       |       |                   |        |       |
|---------------------------|-----------|-----|-------------------|------|-------------------|-------|---------------------|-------|-------|-------------------|--------|-------|
|                           |           |     | Prenatal          |      | Postnatal         |       | Prenatal            |       | p-int | Postnatal         |        | p-int |
|                           |           |     | OR (95% CI)       | p    | OR (95% CI)       | p     | OR (95% CI)         | p     |       | OR (95% CI)       | p      |       |
| Weight                    | Boys      | 584 | 1.02 (0.87, 1.21) | 0.77 | 1.00 (0.90, 1.10) | 0.93  | 1.03 (0.88, 1.20)   | 0.72  | 0.98  | 1.00 (0.90, 1.11) | 1.00   | 0.77  |
|                           | Girls     | 558 | 1.03 (0.91, 1.17) | 0.64 | 0.98 (0.88, 1.10) | 0.78  | 1.04 (0.91, 1.19)   | 0.55  |       | 1.03 (0.92, 1.14) | 0.66   |       |
| Length                    | Boys      | 584 | 1.25 (1.04-1.50)  | 0.02 | 0.99 (0.91-1.08)  | 0.85  | 1.28 (1.07-1.51)    | 0.006 | 0.07  | 1.00 (0.91-1.09)  | 0.93   | 0.10  |
|                           | Girls     | 558 | 1.06 (0.90-1.22)  | 0.47 | 1.08 (0.93-1.23)  | 0.34  | 1.05 (0.90-1.23)    | 0.52  |       | 1.12 (0.99-1.28)  | 0.08   |       |
| Head Circumference        | Boys      | 584 | 1.04 (0.91-1.19)  | 0.59 | 1.08 (1.04-1.13)  | <0.01 | 1.05 (0.92-1.18)    | 0.48  | 0.88  | 1.09 (1.04-1.14)  | <0.001 | 0.91  |
|                           | Girls     | 558 | 1.04 (0.92-1.18)  | 0.53 | 1.08 (1.00-1.17)  | 0.06  | 1.03 (0.91-1.17)    | 0.61  |       | 1.08 (0.98-1.19)  | 0.12   |       |
| MUAC                      | Boys      | 584 | 1.09 (0.92, 1.29) | 0.31 | 1.00 (0.93, 1.08) | 0.98  | 1.13 (0.96, 1.32)   | 0.14  | 0.40  | 1.02 (0.95, 1.10) | 0.60   | 0.38  |
|                           | Girls     | 558 | 1.01 (0.92, 1.12) | 0.81 | 1.03 (0.91, 1.18) | 0.62  | 1.02 (0.91, 1.14)   | 0.77  |       | 1.07 (0.93, 1.23) | 0.35   |       |
| Weight-for-length z-score | Boys      | 577 | 0.92 (0.81, 1.04) | 0.20 | 0.96 (0.87, 1.05) | 0.38  | 0.92 (0.80, 1.05)   | 0.22  | 0.40  | 0.95 (0.86, 1.05) | 0.36   | 0.27  |
|                           | Girls     | 548 | 1.01 (0.89, 1.14) | 0.88 | 0.98 (0.88, 1.10) | 0.76  | 1.02 (0.88, 1.17)   | 0.80  |       | 1.02 (0.91, 1.14) | 0.75   |       |
| Length-for-age z-score    | Boys      | 577 | 1.20 (0.97-1.48)  | 0.09 | 0.97 (0.93-1.02)  | 0.20  | 1.22 (1.01-1.48)    | 0.04  | 0.34  | 0.98 (0.93-1.02)  | 0.34   | 0.93  |
|                           | Girls     | 548 | 1.06 (0.91-1.21)  | 0.47 | 0.95 (0.84-1.07)  | 0.40  | 1.08 (0.89-1.30)    | 0.44  |       | 0.98 (0.86-1.12)  | 0.79   |       |
| Weight-for-age z-score    | Boys      | 577 | 1.00 (0.85, 1.18) | 0.97 | 0.99 (0.90, 1.10) | 0.88  | 1.01 (0.86, 1.18)   | 0.91  | 0.79  | 1.00 (0.90, 1.10) | 0.93   | 0.79  |
|                           | Girls     | 548 | 0.98 (0.83, 1.16) | 0.83 | 0.99 (0.87, 1.13) | 0.91  | 0.99 (0.84, 1.17)   | 0.93  |       | 1.02 (0.89, 1.16) | 0.82   |       |

Note: Per 1 part per million increase in CO, all effects determined with cluster-robust standard errors. P-interaction term generated by introducing an interaction term into the main multivariable model. Sex-stratified OR and 95% CI presented. Analyses are ordinal regression where ORs may be interpreted as the odds of being in a lower/smaller trajectory per 1ppm increase in average CO exposure. Sex-stratified multivariable models include both prenatal and postnatal average CO exposure and adjust for maternal age, ethnicity, and wealth index.

<sup>a</sup> All trajectories include 4 groups except length (3 groups) and head circumference (3 groups).

MUAC = mid upper arm circumference; p-int = p-interaction



**Table S8. Associations between prenatal and postnatal average carbon monoxide (CO) and lowest z-score trajectory as compared to others: Complete model output**

| Variable                            | Length-for-age z-score <sup>b</sup> |            |    |         | Weight-for-length z-score |            |    |         |
|-------------------------------------|-------------------------------------|------------|----|---------|---------------------------|------------|----|---------|
|                                     | OR                                  | LL         | UL | p-value | OR                        | LL         | UL | p-value |
| Prenatal CO, per 1 ppm <sup>a</sup> | 1.25                                | 1.08, 1.45 |    | <0.01   | 1.06                      | 0.87, 1.28 |    | 0.56    |
| Child CO, per 1 ppm <sup>a</sup>    | 0.98                                | 0.84, 1.14 |    | 0.75    | 1.03                      | 0.94, 1.13 |    | 0.47    |
| Maternal age                        | 1.00                                | 0.96, 1.03 |    | 0.81    | 0.97                      | 0.93, 1.02 |    | 0.28    |
| Ethnicity 1 vs 0                    | 1.11                                | 0.27, 4.53 |    | 0.89    | 1.11                      | 0.40, 3.10 |    | 0.84    |
| Ethnicity 2 vs 0                    | 1.81                                | 0.73, 4.53 |    | 0.2     | 2.85                      | 1.15, 7.05 |    | 0.02    |
| Ethnicity 3 vs 0                    | 0.51                                | 0.19, 1.38 |    | 0.19    | 0.84                      | 0.20, 3.61 |    | 0.82    |
| Ethnicity 4 vs 0                    | 2.28                                | 0.97, 5.35 |    | 0.06    | 1.72                      | 0.68, 4.34 |    | 0.25    |
| Ethnicity 5 vs 0                    | 0.92                                | 0.41, 2.04 |    | 0.83    | 1.35                      | 0.51, 3.61 |    | 0.54    |
| Wealth Index 2 vs 1                 | 0.62                                | 0.3, 1.28  |    | 0.19    | 1.57                      | 0.70, 3.51 |    | 0.27    |
| Wealth Index 3 vs 1                 | 0.89                                | 0.46, 1.73 |    | 0.74    | 0.94                      | 0.53, 1.64 |    | 0.82    |
| Wealth Index 4 vs 1                 | 0.71                                | 0.38, 1.33 |    | 0.28    | 1.1                       | 0.37, 3.29 |    | 0.87    |
| Wealth Index 5 vs 1                 | 0.66                                | 0.29, 1.51 |    | 0.32    | 0.72                      | 0.28, 1.82 |    | 0.49    |
| Female Sex                          | 0.36                                | 0.24, 0.54 |    | <0.01   | 0.58                      | 0.33, 1.02 |    | 0.06    |

  

| Variable                            | Weight-for-age z-score |            |    |         |
|-------------------------------------|------------------------|------------|----|---------|
|                                     | OR                     | LL         | UL | p-value |
| Prenatal CO, per 1 ppm <sup>a</sup> | 0.99                   | 0.84, 1.17 |    | 0.93    |
| Child CO, per 1 ppm <sup>a</sup>    | 1.00                   | 0.92, 1.10 |    | 0.92    |
| Maternal age                        | 1.00                   | 0.97, 1.02 |    | 0.73    |
| Ethnicity 1 vs 0                    | 1.11                   | 0.54, 2.30 |    | 0.78    |
| Ethnicity 2 vs 0                    | 2.01                   | 1.09, 3.71 |    | 0.03    |
| Ethnicity 3 vs 0                    | 0.86                   | 0.43, 1.75 |    | 0.68    |
| Ethnicity 4 vs 0                    | 2.08                   | 1.05, 4.11 |    | 0.04    |
| Ethnicity 5 vs 0                    | 1                      | 0.57, 1.75 |    | 0.99    |
| Wealth Index 2 vs 1                 | 1.43                   | 0.69, 2.96 |    | 0.33    |

|                     |      |            |      |
|---------------------|------|------------|------|
| Wealth Index 3 vs 1 | 1.45 | 0.76, 2.79 | 0.26 |
| Wealth Index 4 vs 1 | 1.2  | 0.58, 2.50 | 0.62 |
| Wealth Index 5 vs 1 | 1.57 | 0.75,      | 0.23 |
| Female Sex          | 0.61 | 0.41       | 0.01 |

---

<sup>a</sup> Per 1 part per million (ppm) increase in average CO exposure, all effects determined with cluster-robust standard errors. Lowest weight-for-length, length-for-age and weight-for age z-score trajectories were at or below -2 at each time point consistent with commonly used definitions of wasted, stunted and underweight, respectively. All models include both prenatal and postnatal average CO exposure and adjust for child sex, maternal age, ethnicity, and wealth index.

<sup>b</sup> Logistic regression where ORs may be interpreted as the odds of being in the lowest z-score trajectory as compared to others per 1ppm increase in average CO exposure, respectively.

**Table S9. Associations between prenatal and postnatal average carbon monoxide (CO) and assignment to the lowest z-score trajectory: Logistic regression sensitivity models**

| Lowest Trajectory Assignment | N     | <u>Multivariable Model +Maternal BMI at enrollment</u>  |          |                    |          | N     | <u>Multivariable Model +Breastfeeding Duration</u> |          |                    |          |
|------------------------------|-------|---------------------------------------------------------|----------|--------------------|----------|-------|----------------------------------------------------|----------|--------------------|----------|
|                              |       | Prenatal                                                |          | Postnatal          |          |       | Prenatal                                           |          | Postnatal          |          |
|                              |       | <i>OR (95% CI)</i>                                      | <i>p</i> | <i>OR (95% CI)</i> | <i>p</i> |       | <i>OR (95% CI)</i>                                 | <i>p</i> | <i>OR (95% CI)</i> | <i>p</i> |
| Weight-for-length z-score    | 1,125 | 1.05 (0.87, 1.27)                                       | 0.58     | 1.03 (0.94, 1.13)  | 0.53     | 1,125 | 1.05 (0.86, 1.28)                                  | 0.59     | 1.03 (0.94, 1.14)  | 0.51     |
| Length-for-age z-score       | 1,125 | 1.25 (1.10, 1.42)                                       | <0.01    | 0.98 (0.86, 1.11)  | 0.75     | 1,125 | 1.24 (1.08, 1.41)                                  | <0.01    | 1.00 (0.86, 1.17)  | 0.97     |
| Weight-for-age z-score       | 1,128 | 0.99 (0.84, 1.16)                                       | 0.91     | 1.00 (0.92, 1.09)  | 0.93     | 1,128 | 0.98 (0.83, 1.15)                                  | 0.81     | 1.01 (0.92, 1.11)  | 0.79     |
|                              | N     | <u>Multivariable Model +Gestational Age at Delivery</u> |          |                    |          | N     | <u>Multivariable Model +Birthweight</u>            |          |                    |          |
|                              |       | Prenatal                                                |          | Postnatal          |          |       | Prenatal                                           |          | Postnatal          |          |
|                              |       | <i>OR (95% CI)</i>                                      | <i>p</i> | <i>OR (95% CI)</i> | <i>p</i> |       | <i>OR (95% CI)</i>                                 | <i>p</i> | <i>OR (95% CI)</i> | <i>p</i> |
| Weight-for-length z-score    | 1,125 | 1.06 (0.87, 1.28)                                       | 0.58     | 1.03 (0.94, 1.12)  | 0.54     | 1,121 | 1.04 (0.85, 1.29)                                  | 0.69     | 1.02 (0.94, 1.12)  | 0.60     |
| Length-for-age z-score       | 1,125 | 1.25 (1.11, 1.41)                                       | <0.01    | 0.97 (0.85, 1.10)  | 0.60     | 1,121 | 1.27 (1.11, 1.44)                                  | <0.01    | 0.96 (0.85, 1.08)  | 0.51     |
| Weight-for-age z-score       | 1,128 | 0.99 (0.83, 1.17)                                       | 0.87     | 0.98 (0.89, 1.08)  | 0.65     | 1,120 | 0.91 (0.73, 1.14)                                  | 0.41     | 0.99 (0.90, 1.09)  | 0.84     |

Note: Per 1 part per million (ppm) increase in average CO exposure, all effects determined with cluster-robust standard errors. Lowest weight-for-length, length-for-age and weight-for age z-score trajectories were at or below -2 at each time point consistent with commonly used definitions of wasted, stunted and underweight, respectively.<sup>12</sup> Analyses are logistic regression where ORs may be interpreted as the odds of being in the lowest z-score trajectory as compared to other trajectories per 1ppm increase in average CO exposure, respectively. Multivariable models include both prenatal and postnatal average CO exposure and adjust for child sex, maternal age, ethnicity, and wealth index with additional adjustment for maternal BMI, breastfeeding duration, gestational age at delivery or birthweight as indicated.

BMI = body mass index

**Table S10: Sex-specific associations between prenatal and postnatal average carbon monoxide (CO) and lowest z-score trajectory assignment: Logistic regression**

| Lowest Trajectory Assignment <sup>a</sup> | Child Sex | N   | Bivariate Model  |       | Bivariate Model  |      | Multivariable Model |       |       |                  |      |       |
|-------------------------------------------|-----------|-----|------------------|-------|------------------|------|---------------------|-------|-------|------------------|------|-------|
|                                           |           |     | Prenatal         |       | Postnatal        |      | Prenatal            |       | p-int | Postnatal        |      | p-int |
|                                           |           |     | OR (95% CI)      | p     | OR (95% CI)      | p    | OR (95% CI)         | p     |       | OR (95% CI)      | p    |       |
| Weight-for-length z-score                 | Boys      | 578 | 1.12 (0.88-1.42) | 0.38  | 1.03 (0.94-1.13) | 0.51 | 1.11 (0.90-1.38)    | 0.33  | 0.48  | 1.05 (0.97-1.13) | 0.25 | 0.53  |
|                                           | Girls     | 547 | 0.95 (0.66-1.35) | 0.76  | 0.91 (0.63-1.32) | 0.62 | 0.98 (0.71-1.36)    | 0.90  |       | 0.91 (0.63-1.33) | 0.64 |       |
| Length-for-age z-score                    | Boys      | 577 | 1.37 (1.13-1.66) | <.001 | 0.98 (0.88-1.08) | 0.65 | 1.40 (1.17-1.66)    | <.001 | 0.04  | 1.00 (0.90-1.11) | 0.99 | 0.42  |
|                                           | Girls     | 548 | 0.99 (0.77-1.26) | 0.92  | 0.82 (0.54-1.23) | 0.33 | 1.01 (0.79-1.31)    | 0.88  |       | 0.80 (0.51-1.27) | 0.34 |       |
| Weight-for-age z-score                    | Boys      | 579 | 1.37 (1.13-1.66) | 0.002 | 0.98 (0.88-1.08) | 0.65 | 0.97 (0.78-1.21)    | 0.79  | 0.46  | 1.01 (0.91-1.12) | 0.86 | 0.70  |
|                                           | Girls     | 549 | 1.03 (0.89-1.21) | 0.67  | 0.94 (0.77-1.15) | 0.53 | 1.03 (0.85-1.25)    | 0.73  |       | 0.94 (0.73-1.21) | 0.62 |       |

Note: Per 1 part per million increase in average CO exposure, all effects determined with cluster-robust standard errors. Lowest weight-for-length, length-for-age and weight-for age z-score trajectories were at or below -2 at each time point consistent with commonly used definitions of wasted, stunted and underweight, respectively. P-interaction (p-int) term generated by introducing an interaction term into the multivariable model. Sex-stratified OR and 95% CI presented. Analyses are logistic regression where ORs may be interpreted as the odds of being in the lowest z-score trajectory as compared to other trajectories per 1ppm increase in average CO exposure, respectively. Multivariable models include both prenatal and postnatal average CO exposure and adjust for maternal age, ethnicity, and wealth index.

<sup>a</sup> Of the N=584 boys in the overall study, N= 29 were in the lowest weight-for-length z-score trajectory, N=83 were in the lowest length-for-age z-score trajectory, and N=77 were in the lowest weight-for-age z-score trajectory. Of the N=560 girls, N=17 were in the lowest weight-for-length z-score trajectory, N=32 were in the lowest length-for-age z-score trajectory and N=48 were in the lowest weight-for-age z-score trajectory.

**Table S11. Associations between prenatal and postnatal average particulate matter (PM<sub>2.5</sub>) and growth trajectories: Ordinal regression sensitivity models**

| Trajectory Measurement <sup>a</sup> | N   | <u>Multivariable Model +Maternal BMI at enrollment</u>  |          |                    |          | N   | <u>Multivariable Model +Breastfeeding Duration</u>  |          |                    |          |
|-------------------------------------|-----|---------------------------------------------------------|----------|--------------------|----------|-----|-----------------------------------------------------|----------|--------------------|----------|
|                                     |     | Prenatal                                                |          | Postnatal          |          |     | Prenatal                                            |          | Postnatal          |          |
|                                     |     | <i>OR (95% CI)</i>                                      | <i>p</i> | <i>OR (95% CI)</i> | <i>p</i> |     | <i>OR (95% CI)</i>                                  | <i>p</i> | <i>OR (95% CI)</i> | <i>p</i> |
| Weight                              | 358 | 0.99 (0.94, 1.04)                                       | 0.69     | 1.02 (0.94, 1.10)  | 0.64     | 358 | 1.00 (0.94, 1.05)                                   | 0.86     | 1.02 (0.94, 1.11)  | 0.67     |
| Length                              | 358 | 1.07 (1.01, 1.12)                                       | 0.01     | 0.98 (0.91, 1.05)  | 0.52     | 358 | 1.07 (1.02, 1.12)                                   | 0.008    | 0.98 (0.91, 1.05)  | 0.54     |
| Head circumference                  | 358 | 1.03 (0.97, 1.08)                                       | 0.33     | 0.99 (0.93, 1.06)  | 0.81     | 358 | 1.03 (0.97, 1.08)                                   | 0.33     | 0.99 (0.93, 1.06)  | 0.79     |
| MUAC                                | 358 | 1.02 (0.97, 1.07)                                       | 0.50     | 1.07 (1.00, 1.14)  | 0.047    | 358 | 1.02 (0.97, 1.08)                                   | 0.43     | 1.07 (1.00, 1.14)  | 0.04     |
| Weight for length z-score           | 356 | 0.95 (0.91, 1.00)                                       | 0.04     | 1.09 (1.01, 1.19)  | 0.03     | 356 | 0.95 (0.91, 1.00)                                   | 0.07     | 1.10 (1.01, 1.20)  | 0.04     |
| Length for age z-score              | 356 | 1.04 (0.99, 1.09)                                       | 0.11     | 0.97 (0.91, 1.03)  | 0.28     | 356 | 1.04 (1.00, 1.09)                                   | 0.08     | 0.97 (0.91, 1.03)  | 0.30     |
| Weight for age z-score              | 356 | 1.00 (0.95, 1.05)                                       | 0.91     | 1.02 (0.95, 1.09)  | 0.58     | 356 | 1.00 (0.95, 1.05)                                   | 0.93     | 1.02 (0.95, 1.09)  | 0.57     |
|                                     |     | <u>Multivariable Model +Gestational Age at Delivery</u> |          |                    |          |     | <u>Multivariable Model +Birthweight<sup>b</sup></u> |          |                    |          |
|                                     |     | Prenatal                                                |          | Postnatal          |          |     | Prenatal                                            |          | Postnatal          |          |
|                                     |     | <i>OR (95% CI)</i>                                      | <i>p</i> | <i>OR (95% CI)</i> | <i>p</i> |     | <i>OR (95% CI)</i>                                  | <i>p</i> | <i>OR (95% CI)</i> | <i>p</i> |
| Weight                              | 358 | 0.99 (0.94, 1.05)                                       | 0.79     | 1.02 (0.94, 1.11)  | 0.64     |     | --                                                  | --       | --                 | --       |
| Length                              | 358 | 1.07 (1.02, 1.12)                                       | 0.007    | 0.98 (0.91, 1.05)  | 0.56     | 357 | 1.06 (1.01, 1.12)                                   | 0.01     | 0.98 (0.91, 1.06)  | 0.63     |
| Head circumference                  | 358 | 1.03 (0.97, 1.08)                                       | 0.32     | 0.99 (0.93, 1.06)  | 0.81     | 357 | 1.02 (0.97, 1.07)                                   | 0.42     | 1.00 (0.93, 1.06)  | 0.89     |
| MUAC                                |     | 1.02 (0.97, 1.07)                                       | 0.47     | 1.07 (1.00, 1.14)  | 0.04     | 357 | 1.01 (0.96, 1.07)                                   | 0.67     | 1.07 (1.01, 1.14)  | 0.03     |
| Weight for length z-score           | 356 | 0.95 (0.91, 1.00)                                       | 0.06     | 1.09 (1.01, 1.19)  | 0.03     | 355 | 0.95 (0.90, 1.00)                                   | 0.03     | 1.10 (1.01, 1.19)  | 0.02     |
| Length for age z-score              | 356 | 1.04 (1.00, 1.09)                                       | 0.08     | 0.97 (0.91, 1.03)  | 0.30     | 355 | 1.04 (0.98, 1.09)                                   | 0.18     | 0.97 (0.92, 1.03)  | 0.36     |
| Weight for age z-score              | 356 | 1.00 (0.95, 1.05)                                       | 0.99     | 1.02 (0.95, 1.10)  | 0.56     | 355 | 0.99 (0.94, 1.04)                                   | 0.65     | 1.03 (0.97, 1.10)  | 0.33     |

Note: Per 10 µg/m<sup>3</sup> increase in PM<sub>2.5</sub> exposure, all effects determined with cluster-robust standard errors. Analyses are ordinal regression where ORs may be interpreted as the odds of being in a lower/smaller trajectory per 10µg/m<sup>3</sup> increase in PM<sub>2.5</sub> exposure. Multivariable models include both prenatal and postnatal PM<sub>2.5</sub> exposure and adjust for child sex, maternal age, ethnicity, wealth index with additional adjustment for maternal BMI, breastfeeding duration, gestational age at delivery or birthweight as indicated.

<sup>a</sup> All trajectories include 4 groups except length (3 groups) and head circumference (3 groups).

<sup>b</sup> Additional adjustment for birthweight not done for weight trajectory, as birth weight is used in the construction of this trajectory.

MUAC= mid upper arm circumference, BMI=body mass index

**Table S12: Sex-specific associations between prenatal and postnatal average particulate matter (PM<sub>2.5</sub>) exposure and growth trajectories: Ordinal regression**

| Trajectory <sup>b</sup>   | Child Sex | N   | Bivariate Model   |       | Bivariate Model   |      | Multivariable Model <sup>a</sup> |        |       |                   |      |       |
|---------------------------|-----------|-----|-------------------|-------|-------------------|------|----------------------------------|--------|-------|-------------------|------|-------|
|                           |           |     | Prenatal          |       | Postnatal         |      | Prenatal                         |        |       | Postnatal         |      |       |
|                           |           |     | OR (95% CI)       | p     | OR (95% CI)       | p    | OR (95% CI)                      | p      | p-int | OR (95% CI)       | p    | p-int |
| Weight                    | Boys      | 193 | 1.00 (0.82, 1.21) | 0.97  | 1.04 (0.95, 1.14) | 0.43 | 1.03 (0.85, 1.25)                | 0.77   | 0.11  | 1.01 (0.89, 1.16) | 0.85 | 0.97  |
|                           | Girls     | 165 | 0.84 (0.65, 1.09) | 0.20  | 1.03 (0.77, 1.38) | 0.84 | 0.76 (0.53, 1.11)                | 0.16   |       | 0.98 (0.73, 1.32) | 0.92 |       |
| Length                    | Boys      | 193 | 1.02 (0.95-1.10)  | 0.50  | 1.00 (0.92-1.09)  | 0.98 | 1.04 (0.97-1.10)                 | 0.27   | 0.13  | 1.00 (0.92-1.07)  | 0.89 | 0.88  |
|                           | Girls     | 165 | 1.13 (1.05-1.22)  | 0.002 | 1.00 (0.91-1.10)  | 0.97 | 1.14 (1.06-1.21)                 | <0.001 |       | 0.96 (0.84-1.07)  | 0.44 |       |
| MUAC                      | Boys      | 193 | 1.01 (0.95-1.08)  | 0.72  | 1.00 (0.92-1.09)  | 0.99 | 1.04 (0.97-1.11)                 | 0.27   | 0.79  | 1.02 (0.91-1.12)  | 0.78 | 0.10  |
|                           | Girls     | 165 | 1.05 (0.97-1.12)  | 0.22  | 1.15 (1.03-1.29)  | 0.02 | 0.99 (0.91-1.06)                 | 0.76   |       | 1.16 (1.03-1.30)  | 0.02 |       |
| Head circumference        | Boys      | 193 | 0.87 (0.69, 1.09) | 0.23  | 1.12 (1.02, 1.22) | 0.01 | 0.92 (0.71, 1.19)                | 0.52   | 0.92  | 1.11 (1.00, 1.23) | 0.05 | 0.48  |
|                           | Girls     | 165 | 0.97 (0.55, 1.71) | 0.93  | 1.24 (0.98, 1.56) | 0.07 | 0.90 (0.53, 1.52)                | 0.69   |       | 1.15 (0.94, 1.42) | 0.18 |       |
| Weight for length z-score | Boys      | 192 | 0.96 (0.91-1.02)  | 0.21  | 1.04 (0.94-1.14)  | 0.44 | 0.96 (0.90-1.03)                 | 0.27   | 0.79  | 1.06 (0.97-1.16)  | 0.19 | 0.45  |
|                           | Girls     | 164 | 0.96 (0.90-1.02)  | 0.26  | 1.10 (0.99-1.23)  | 0.09 | 0.94 (0.88-1.00)                 | 0.04   |       | 1.16 (1.04-1.29)  | 0.01 |       |
| Length for age z-score    | Boys      | 192 | 1.02 (0.97-1.08)  | 0.39  | 0.97 (0.89-1.06)  | 0.48 | 1.05 (1.00-1.09)                 | 0.04   | 0.82  | 0.95 (0.87-1.04)  | 0.28 | 0.76  |
|                           | Girls     | 164 | 1.05 (0.96-1.15)  | 0.30  | 1.01 (0.93-1.09)  | 0.88 | 1.05 (0.96-1.13)                 | 0.32   |       | 0.99 (0.90-1.07)  | 0.75 |       |
| Weight-for-age z-score    | Boys      | 192 | 1.00 (0.83, 1.20) | 0.96  | 1.04 (0.95, 1.13) | 0.44 | 1.02 (0.85, 1.23)                | 0.81   | <0.01 | 1.02 (0.89, 1.16) | 0.82 | 0.58  |
|                           | Girls     | 164 | 0.68 (0.54, 0.85) | <0.01 | 0.96 (0.74, 1.25) | 0.77 | 0.59 (0.41, 0.85)                | 0.01   |       | 0.89 (0.67, 1.20) | 0.45 |       |

Note: Per 10 µg/m<sup>3</sup> increase in PM<sub>2.5</sub>, all effects determined with cluster-robust standard errors. P-interaction term generated by introducing an interaction term into the multivariable model. Sex-stratified OR and 95% CI presented.

<sup>a</sup> Multivariable models include both prenatal and postnatal average PM<sub>2.5</sub> exposure and adjust for maternal age, ethnicity, wealth index.

<sup>b</sup> All trajectories include 4 groups except length (3 groups) and head circumference (3 groups).

MUAC = mid upper arm circumference

**Table S13: Associations between cookstove intervention arm and anthropometric growth trajectories: Multivariable Ordinal Regression sensitivity models**

| Trajectory Measurement <sup>a</sup> | # Participants |                  |     | <u>Multivariable Model +Maternal BMI</u>                |      |                               |      | <u>Multivariable Model +Breastfeeding Duration</u>  |      |                               |      |
|-------------------------------------|----------------|------------------|-----|---------------------------------------------------------|------|-------------------------------|------|-----------------------------------------------------|------|-------------------------------|------|
|                                     | Control        | Improved Biomass | LPG | Improved Biomass vs Control (3-Stone Fire)              |      | LPG vs Control (3-Stone Fire) |      | Improved Biomass vs Control (3-Stone Fire)          |      | LPG vs Control (3-Stone Fire) |      |
|                                     |                |                  |     | OR (95% CI)                                             | p    | OR (95% CI)                   | p    | OR (95% CI)                                         | p    | OR (95% CI)                   | p    |
| Weight                              | 414            | 430              | 300 | 1.09 (0.77-1.53)                                        | 0.63 | 0.91 (0.61-1.37)              | 0.66 | 1.04 (0.74-1.48)                                    | 0.81 | 0.90 (0.59-1.36)              | 0.60 |
| Length                              | 414            | 430              | 300 | 0.99 (0.51-1.92)                                        | 0.97 | 0.81 (0.44-1.51)              | 0.51 | 0.98 (0.50-1.90)                                    | 0.94 | 0.78 (0.42-1.46)              | 0.44 |
| Head circumference                  | 414            | 430              | 300 | 0.77 (0.49-1.21)                                        | 0.26 | 0.57 (0.37-0.93)              | 0.02 | 0.77 (0.49-1.21)                                    | 0.26 | 0.59 (0.37-0.94)              | 0.02 |
| MUAC                                | 414            | 430              | 300 | 0.94 (0.57-1.53)                                        | 0.79 | 0.46 (0.23-0.91)              | 0.03 | 0.92 (0.56-1.51)                                    | 0.73 | 0.46 (0.23-0.94)              | 0.03 |
| Weight for length z-score           | 408            | 420              | 299 | 0.95 (0.61-1.47)                                        | 0.81 | 0.93 (0.59-1.46)              | 0.74 | 0.92 (0.59-1.44)                                    | 0.73 | 0.93 (0.58-1.49)              | 0.76 |
| Length for age z-score              | 409            | 420              | 298 | 1.17 (0.64-2.13)                                        | 0.61 | 0.98 (0.56-1.72)              | 0.95 | 1.16 (0.63-2.12)                                    | 0.64 | 0.96 (0.55-1.68)              | 0.89 |
| Weight for age z-score              | 411            | 420              | 299 | 1.20 (0.89-1.63)                                        | 0.24 | 1.00 (0.72-1.39)              | 0.99 | 1.16 (0.86-1.57)                                    | 0.33 | 1.01 (0.72-1.41)              | 0.95 |
| Trajectory Measurement <sup>a</sup> | # Participants |                  |     | <u>Multivariable Model +Gestational Age at Delivery</u> |      |                               |      | <u>Multivariable Model +Birthweight<sup>b</sup></u> |      |                               |      |
|                                     | Control        | Improved Biomass | LPG | Improved Biomass vs Control (3-Stone Fire)              |      | LPG vs Control (3-Stone Fire) |      | Improved Biomass vs Control (3-Stone Fire)          |      | LPG vs Control (3-Stone Fire) |      |
|                                     |                |                  |     | OR (95% CI)                                             | p    | OR (95% CI)                   | p    | OR (95% CI)                                         | p    | OR (95% CI)                   | p    |
| Weight                              | 414            | 430              | 300 | 1.07 (0.75-1.51)                                        | 0.71 | 0.90 (0.60-1.35)              | 0.60 | --                                                  | --   | --                            | --   |
| Length                              | 414            | 430              | 300 | 1.00 (0.51-1.95)                                        | 0.99 | 0.81 (0.44-1.50)              | 0.51 | 0.96 (0.48-1.93)                                    | 0.91 | 0.79 (0.40-1.56)              | 0.50 |
| Head circumference                  | 414            | 430              | 300 | 0.78 (0.49-1.24)                                        | 0.29 | 0.59 (0.37-0.92)              | 0.02 | 0.75 (0.47-1.19)                                    | 0.23 | 0.56 (0.34-0.94)              | 0.03 |
| MUAC                                | 414            | 430              | 300 | 0.92 (0.56-1.51)                                        | 0.74 | 0.45 (0.22-0.91)              | 0.02 | 0.93 (0.57-1.52)                                    | 0.78 | 0.45 (0.22-0.92)              | 0.03 |
| Weight for length z-score           | 408            | 420              | 299 | 0.92 (0.59-1.44)                                        | 0.73 | 0.89 (0.56-1.43)              | 0.63 | 0.94 (0.61-1.46)                                    | 0.79 | 0.91 (0.58-1.44)              | 0.69 |
| Length for age z-score              | 409            | 420              | 298 | 1.18 (0.64-2.18)                                        | 0.59 | 0.98 (0.56-1.72)              | 0.94 | 1.17 (0.61-2.25)                                    | 0.64 | 0.98 (0.51-1.86)              | 0.94 |
| Weight for age z-score              | 411            | 420              | 299 | 1.18 (0.87-1.60)                                        | 0.29 | 0.98 (0.71-1.35)              | 0.88 | 1.19 (0.87-1.61)                                    | 0.28 | 1.01 (0.72-1.42)              | 0.96 |

Note: Multivariable models adjust for child sex, maternal age, ethnicity, and wealth index with additional adjustment for maternal BMI, breastfeeding duration, gestational age at delivery or birthweight as indicated. Z-score trajectory multivariable models adjust for maternal age, ethnicity, and wealth index; Z-scores calculated using child sex. All models with cluster-robust standard errors.

<sup>a</sup> All trajectories include 4 groups except length (3 groups) and head circumference (3 groups).

<sup>b</sup> Additional adjustment for birthweight not done for weight trajectory, as birth weight is used in the construction of this trajectory

MUAC = mid upper arm circumference, BMI = body mass index, LPG = liquefied petroleum gas

**Table S14. Sex-specific associations between cookstove intervention arm and anthropometric growth trajectories**

| Trajectory <sup>b</sup>            | # Participants |                  |     | Bivariate Model                            |      |                               |       | Multivariable Model <sup>a</sup>           |      |       |                               |       |       |
|------------------------------------|----------------|------------------|-----|--------------------------------------------|------|-------------------------------|-------|--------------------------------------------|------|-------|-------------------------------|-------|-------|
|                                    | Control        | Improved Biomass | LPG | Improved Biomass vs Control (3-Stone Fire) |      | LPG vs Control (3-Stone Fire) |       | Improved Biomass vs Control (3-Stone Fire) |      | p-int | LPG vs Control (3-Stone Fire) |       | p-int |
|                                    |                |                  |     | OR (95% CI)                                | p    | OR (95% CI)                   | p     | OR (95% CI)                                | p    |       | OR (95% CI)                   | p     |       |
| <b>Weight</b>                      |                |                  |     |                                            |      |                               |       |                                            |      |       |                               |       |       |
| Boys                               | 199            | 238              | 147 | 1.30 (0.89, 1.90)                          | 0.18 | 1.23 (0.70, 2.15)             | 0.47  | 1.27 (0.87, 1.83)                          | 0.21 | 0.07  | 1.12 (0.67, 1.88)             | 0.66  | 0.08  |
| Girls                              | 215            | 192              | 153 | 0.90 (0.59, 1.37)                          | 0.62 | 0.83 (0.54, 1.26)             | 0.38  | 0.84 (0.54, 1.30)                          | 0.43 |       | 0.70 (0.44, 1.12)             | 0.14  |       |
| <b>Length</b>                      |                |                  |     |                                            |      |                               |       |                                            |      |       |                               |       |       |
| Boys                               | 199            | 238              | 147 | 1.21 (0.62-2.36)                           | 0.57 | 1.21 (0.60-2.45)              | 0.60  | 1.16 (0.59-2.29)                           | 0.67 | 0.11  | 1.07 (0.53-2.15)              | 0.78  | 0.03  |
| Girls                              | 215            | 192              | 153 | 0.77 (0.34-1.72)                           | 0.53 | 0.63 (0.31-1.27)              | 0.20  | 0.78 (0.37-1.68)                           | 0.53 |       | 0.55 (0.31-1.00)              | 0.051 |       |
| <b>Head circumference</b>          |                |                  |     |                                            |      |                               |       |                                            |      |       |                               |       |       |
| Boys                               | 199            | 238              | 147 | 0.93 (0.58-1.48)                           | 0.76 | 1.04 (0.57-1.91)              | 0.89  | 0.91 (0.56-1.46)                           | 0.68 | 0.23  | 0.90 (0.52-1.56)              | 0.70  | <0.01 |
| Girls                              | 215            | 192              | 153 | 0.65 (0.35-1.24)                           | 0.19 | 0.42 (0.24-0.75)              | 0.004 | 0.64 (0.36-1.17)                           | 0.15 |       | 0.38 (0.22-0.65)              | <0.01 |       |
| <b>Mid Upper Arm Circumference</b> |                |                  |     |                                            |      |                               |       |                                            |      |       |                               |       |       |
| Boys                               | 199            | 238              | 147 | 0.94 (0.50-1.75)                           | 0.84 | 0.45 (0.21-0.96)              | 0.04  | 0.97 (0.53-1.79)                           | 0.93 | 0.69  | 0.45 (0.20-1.01)              | 0.054 | 0.83  |
| Girls                              | 215            | 192              | 153 | 0.87 (0.52-1.45)                           | 0.60 | 0.43 (0.21-0.89)              | 0.02  | 0.85 (0.52-1.40)                           | 0.52 |       | 0.46 (0.21-0.97)              | 0.04  |       |
| <b>Weight-for-length z-score</b>   |                |                  |     |                                            |      |                               |       |                                            |      |       |                               |       |       |
| Boys                               | 199            | 238              | 147 | 1.15 (0.74, 1.78)                          | 0.53 | 0.95 (0.53, 1.71)             | 0.86  | 1.08 (0.66, 1.77)                          | 0.76 | 0.25  | 0.87 (0.49, 1.54)             | 0.63  | 0.71  |
| Girls                              | 215            | 192              | 153 | 0.78 (0.45, 1.37)                          | 0.39 | 1.05 (0.60, 1.84)             | 0.86  | 0.74 (0.40, 1.37)                          | 0.34 |       | 0.90 (0.53, 1.54)             | 0.71  |       |
| <b>Length-for-age z-score</b>      |                |                  |     |                                            |      |                               |       |                                            |      |       |                               |       |       |
| Boys                               | 199            | 238              | 147 | 1.25 (0.65, 2.41)                          | 0.50 | 1.32 (0.71, 2.47)             | 0.38  | 1.26 (0.63, 2.50)                          | 0.51 | 0.46  | 1.25 (0.66, 2.37)             | 0.50  | 0.10  |
| Girls                              | 215            | 192              | 153 | 1.05 (0.56, 1.97)                          | 0.88 | 0.79 (0.44, 1.42)             | 0.43  | 1.04 (0.57, 1.89)                          | 0.90 |       | 0.75 (0.42, 1.34)             | 0.33  |       |
| <b>Weight-for-age z-score</b>      |                |                  |     |                                            |      |                               |       |                                            |      |       |                               |       |       |
| Boys                               | 199            | 238              | 147 | 1.29 (0.94, 1.75)                          | 0.11 | 1.23 (0.72, 2.11)             | 0.44  | 1.27 (0.93, 1.72)                          | 0.13 | 0.43  | 1.14 (0.69, 1.88)             | 0.62  | 0.30  |
| Girls                              | 215            | 192              | 153 | 1.09 (0.70, 1.70)                          | 0.71 | 0.95 (0.67, 1.35)             | 0.79  | 1.05 (0.70, 1.57)                          | 0.81 |       | 0.84 (0.60, 1.18)             | 0.32  |       |

Note:

<sup>a</sup> Multivariable models include both prenatal and postnatal average PM<sub>2.5</sub> exposure and adjust for maternal age, ethnicity, and wealth index. All models with cluster-robust standard errors. P-interaction term generated by introducing an interaction term into the multivariable model. Sex-stratified OR and 95% CI presented.

<sup>b</sup> All trajectories include 4 groups except length (3 groups) and head circumference (3 groups).

LPG = liquefied petroleum gas



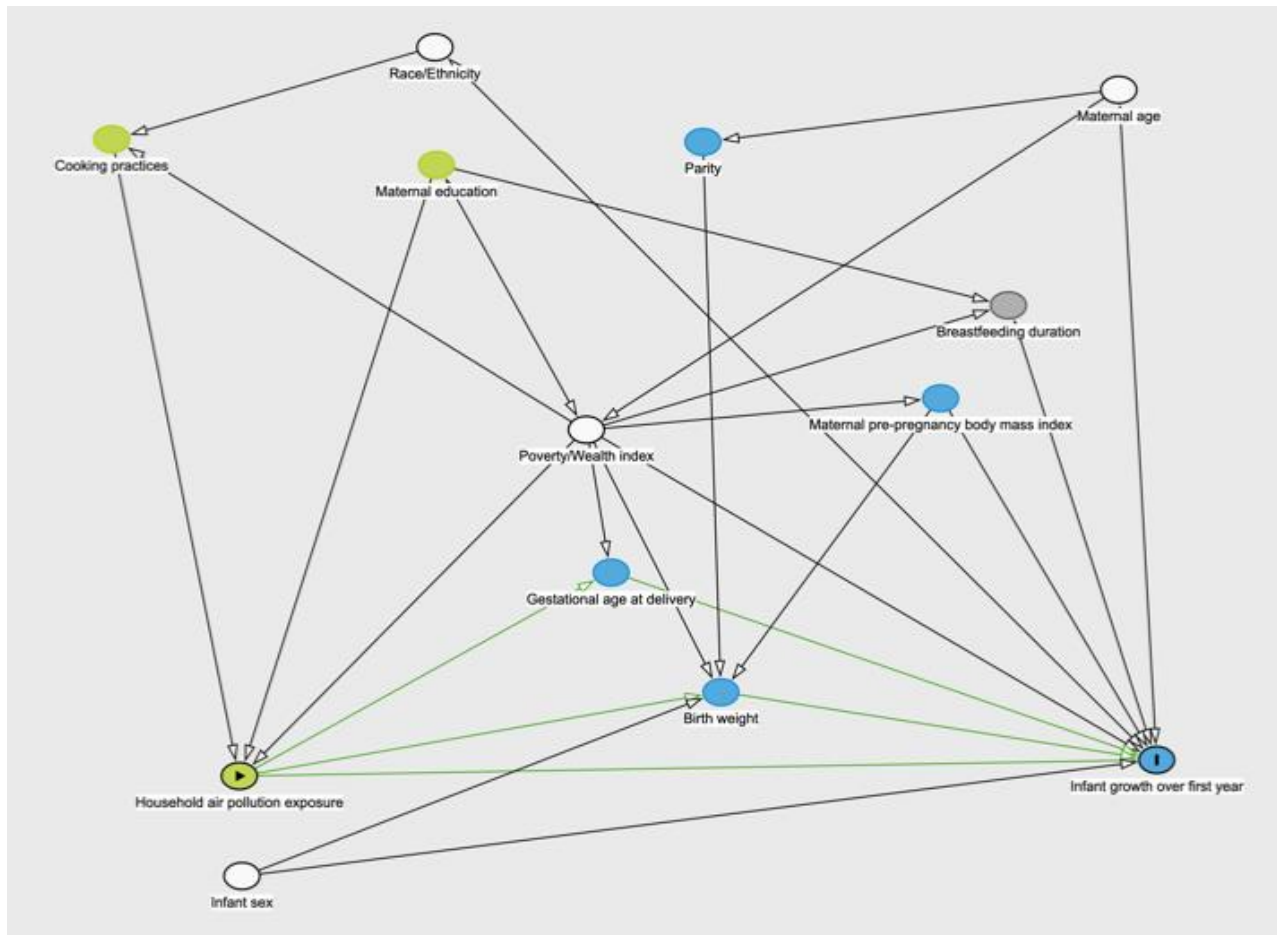

**Figure S1.** Directed Acyclic Graph illustrating implied conditional dependencies amongst study variables. The green circle with black inset triangle represents the exposure of interest (prenatal and postnatal household air pollution exposure). The blue circle with the vertical line represents the outcome of interest (infant growth). Green lines represent unbiased causal pathways. Black lines represent neither unbiased causal pathways nor potentially biased paths. White circles represent adjusted variables in the minimally-sufficient adjustment set (infant sex, race/ethnicity, wealth index, maternal age). Sensitivity models additionally adjust for gestational age at delivery, birth weight, breastfeeding duration or maternal body mass index. DAGgity v3.0 available at <http://www.dagitty.net/>

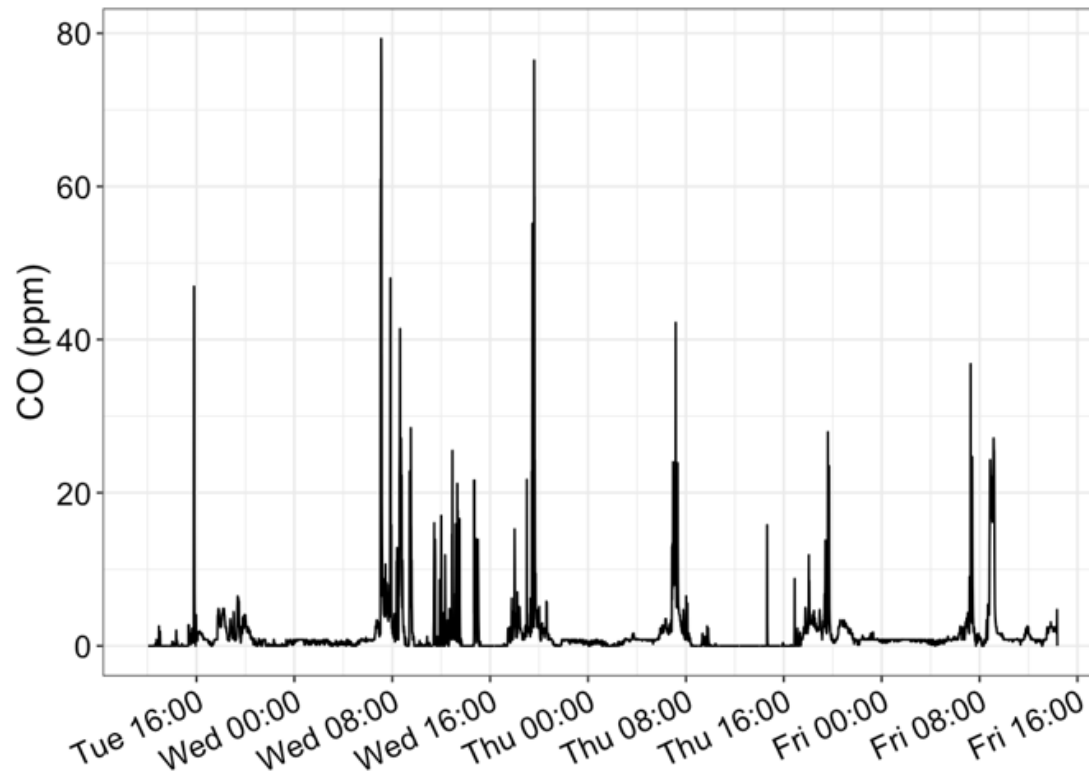

**Figure S2.** This figure demonstrates a representative plot of a maternal prenatal 72-hour personal carbon monoxide (CO) exposure in parts per million (ppm) over time. The Lascar EL-CO-USB Data Logger was worn in the participant's breathing zone and measured CO levels every 10 seconds which were then averaged into 1-minute averages. Reported cooking periods correspond with elevated CO exposures; outside of these cooking episodes the CO exposures were near zero. The first 48-hours were used in analyses and for this session the 48-hour average CO exposure was 1.62ppm (range 0-79.3ppm).

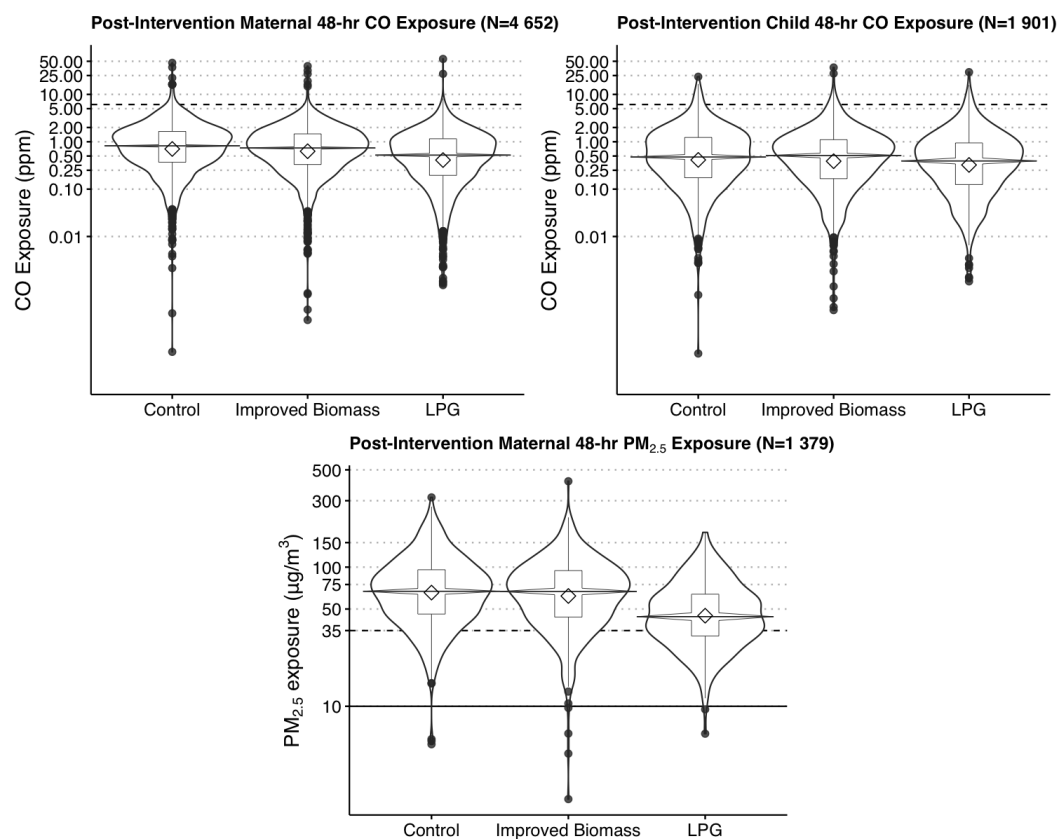

**Figure S3.** Post intervention exposure by study arm for (A) 48-hr maternal CO measurements, (B) 48-hr children CO measurements, and (C) 48-hr maternal PM<sub>2.5</sub>. Violin plots display mirrored density along the variable range. Boxplots depict the median – extended by a notch for clarity – with lower and upper hinges corresponding with the 25th and 75th percentile. Whiskers extend 1.5 times the interquartile range from the hinge. Outliers beyond the whiskers are depicted as points. Diamonds represent distribution means. In plots A, B, and D the WHO guideline for CO exposure is drawn in a dotted line and in plot C the WHO guidelines for PM<sub>2.5</sub> exposure are drawn in a dotted line (interim guideline: 35) and a solid line (guideline: 10). The y-axis is log-transformed to improve readability because of the clustering of exposure levels at lower values.

Reproduced with permission from Chillrud et al. (2021) *Journal of exposure science and environmental epidemiology* (Figure S5)

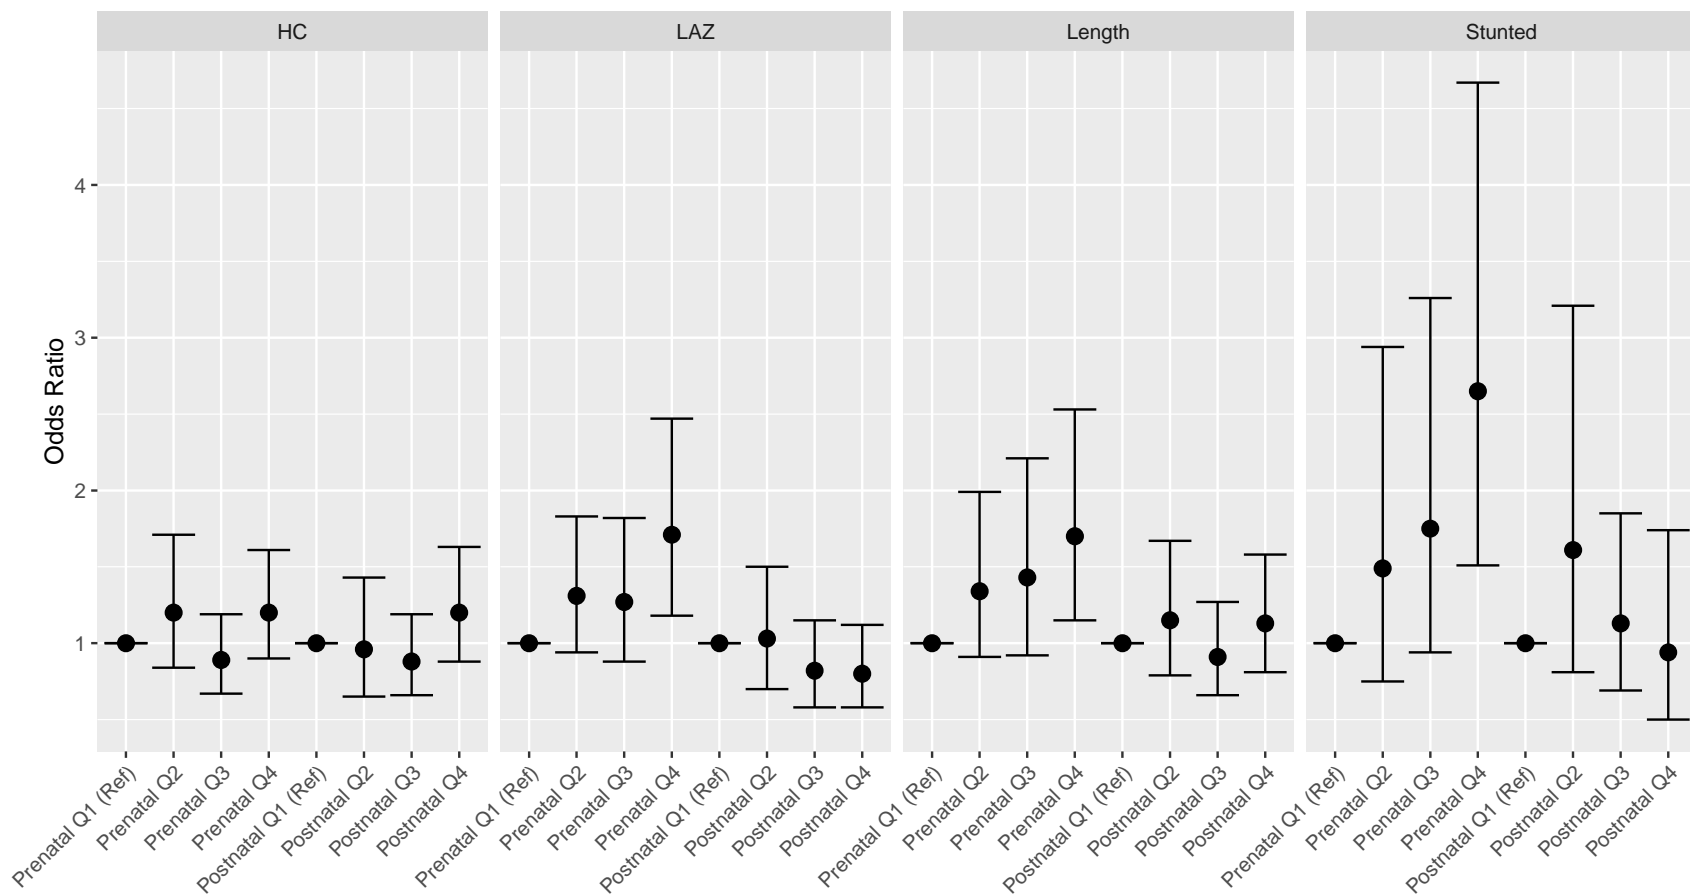

**Figure S4.** This figure shows associations between interquartile change in prenatal and postnatal average carbon monoxide (CO) exposure and head circumference (HC), length-for-age z-score (LAZ), length and lowest length-for-age z-score (stunted). Here we show a linear relationship between quartile of CO exposure and LAZ ( $P_{\text{trend}}=0.01$ ), length ( $P_{\text{trend}}=0.01$ ), and stunted ( $P_{\text{trend}}<0.01$ ). We note that while postnatal CO exposure is associated with smaller head circumference trajectory in the primary analyses, we do not see a linear trend in these analyses by interquartile change in CO exposure.
