# Supplementary material
Source: PubMed Central journal article supplement (PMC8629028)
Supplement: ehp8109.smcontents.508.pdf [file ehp8109.smcontents.508.pdf]

**Note to readers with disabilities:** *EHP* strives to ensure that all journal content is accessible to all readers. However, some figures and Supplemental Material published in *EHP* articles may not conform to [508 standards](#) due to the complexity of the information being presented. If you need assistance accessing journal content, please contact [ehp508@niehs.nih.gov](mailto:ehp508@niehs.nih.gov). Our staff will work with you to assess and meet your accessibility needs within 3 working days.

### **Supplemental Material**

#### **Prenatal and Postnatal Household Air Pollution Exposure and Infant Growth Trajectories: Evidence from a Rural Ghanaian Pregnancy Cohort**

Ellen Boamah-Kaali, Darby W. Jack, Kenneth A. Ae-Ngibise, Ashlinn Quinn, Seyram Kaali, Kathryn Dubowski, Felix B. Oppong, Blair J Wylie, Mohammed N. Mujtaba, Carlos F. Gould, Stephaney Gyaase, Steven Chillrud, Seth Owusu-Agyei, Patrick L. Kinney, Kwaku Poku Asante, and Alison G. Lee

#### **Table of Contents**

**Table S1.** Household characteristics used to construct the wealth index.

**Table S2.** Distribution of anthropometric measurements by age, for all children and by study arm.

**Table S3.** Fit statistics for latent class growth analysis.

**Table S4.** Posterior probabilities by trajectory assignment.

**Table S5.** Associations between prenatal and postnatal average carbon monoxide (CO) and growth trajectories: Complete model output.

**Table S6.** Associations between prenatal and postnatal average carbon monoxide (CO) and growth trajectories: Ordinal regression sensitivity models.

**Table S7.** Sex-specific associations between prenatal and postnatal average carbon monoxide (CO) exposure and growth trajectories: Ordinal regression.

**Table S8.** Associations between prenatal and postnatal average carbon monoxide (CO) and lowest z-score trajectory as compared to others: Complete model output.

**Table S9.** Associations between prenatal and postnatal average carbon monoxide (CO) and assignment to the lowest z-score trajectory: Logistic regression sensitivity models.

**Table S10.** Sex-specific associations between prenatal and postnatal average carbon monoxide (CO) and lowest z-score trajectory assignment: Logistic regression.

**Table S11.** Associations between prenatal and postnatal average particulate matter (PM<sub>2.5</sub>) and growth trajectories: Ordinal regression sensitivity models.

**Table S12.** Sex-specific associations between prenatal and postnatal average particulate matter (PM<sub>2.5</sub>) exposure and growth trajectories: Ordinal regression.

**Table S13.** Associations between cookstove intervention arm and anthropometric growth trajectories: Multivariable Ordinal Regression sensitivity models.

**Table S14.** Sex-specific associations between cookstove intervention arm and anthropometric growth trajectories.

**Figure S1.** Directed Acyclic Graph illustrating implied conditional dependencies amongst study variables. The green circle with black inset triangle represents the exposure of interest (prenatal and postnatal household air pollution exposure). The blue circle with the vertical line represents the outcome of interest (infant growth). Green lines represent unbiased causal pathways. Black lines represent neither unbiased causal pathways nor potentially biased paths. White circles represent adjusted variables in the minimally-sufficient adjustment set (infant sex, race/ethnicity, wealth index, maternal age). Sensitivity models additionally adjust for gestational age at delivery, birth weight, breastfeeding duration or maternal body mass index. DAGgity v3.0 available at <http://www.dagitty.net/>.

**Figure S2.** This figure demonstrates a representative plot of a maternal prenatal 72-hour personal carbon monoxide (CO) exposure in parts per million (ppm) over time. The Lascar EL-CO-USB Data Logger was worn in the participant's breathing zone and measured CO levels every 10 seconds which were then averaged into 1-minute averages. Reported cooking periods correspond with elevated CO exposures; outside of these cooking episodes the CO exposures were near zero. The first 48-hours were used in analyses and for this session the 48-hour average CO exposure was 1.62ppm (range 0-79.3ppm).

**Figure S3.** Post intervention exposure by study arm for (A) 48-hr maternal CO measurements, (B) 48-hr children CO measurements, and (C) 48-hr maternal PM<sub>2.5</sub>. Violin plots display mirrored density along the variable range. Boxplots depict the median – extended by a notch for clarity – with lower and upper hinges corresponding with the 25th and 75th percentile. Whiskers extend 1.5 times the interquartile range from the hinge. Outliers beyond the whiskers are depicted as points. Diamonds represent distribution means. In plots A, B, and D the WHO guideline for CO exposure is drawn in a dotted line and in plot C the WHO guidelines for PM<sub>2.5</sub> exposure are drawn in a dotted line (interim guideline: 35) and a solid line (guideline: 10). The y-axis is log-transformed to improve readability because of the clustering of exposure levels at lower values.

**Figure S4.** This figure shows associations between interquartile change in prenatal and postnatal average carbon monoxide (CO) exposure and head circumference (HC), length-for-age z-score (LAZ), length and lowest length-for-age z-score (stunted). Here we show a linear relationship between quartile of CO exposure and LAZ ( $P_{\text{trend}}=0.01$ ), length ( $P_{\text{trend}}=0.01$ ), and stunted ( $P_{\text{trend}}<0.01$ ). We note that while postnatal CO exposure is associated with smaller head circumference trajectory in the primary analyses, we do not see a linear trend in these analyses by interquartile change in CO exposure.
